1 **Genetic Factors Associated with Prostate Cancer**  
2 **Conversion from Active Surveillance to Treatment**

3  
4 Yu Jiang,<sup>1,41</sup> Travis J. Meyers,<sup>1,41</sup> Adaeze A. Emeka,<sup>2</sup> Lauren Folgosa Cooley,<sup>2</sup> Phillip R.  
5 Cooper,<sup>2</sup> Nicola Lancki,<sup>3</sup> Irene Helenowski,<sup>3</sup> Linda Kachuri,<sup>1</sup> Daniel W. Lin,<sup>4,5</sup> Janet L.  
6 Stanford,<sup>6,7</sup> Lisa F. Newcomb,<sup>4,5</sup> Suzanne Kolb,<sup>6,7</sup> Antonio Finelli,<sup>8</sup> Neil E. Fleshner,<sup>8</sup> Maria  
7 Komisarenko,<sup>8</sup> James A. Eastham,<sup>9</sup> Behfar Ehdaie,<sup>9</sup> Nicole Benfante,<sup>9</sup> Christopher J.  
8 Logothetis,<sup>10</sup> Justin R. Gregg,<sup>10</sup> Cherie A. Perez,<sup>10</sup> Sergio Garza,<sup>10</sup> Jeri Kim,<sup>10</sup> Leonard S.  
9 Marks,<sup>11</sup> Merdie Delfin,<sup>11</sup> Danielle Barsa,<sup>11</sup> Danny Vesprini,<sup>12</sup> Laurence H. Klotz,<sup>12</sup> Andrew  
10 Loblaw,<sup>12</sup> Alexandre Mamedov,<sup>12</sup> S. Larry Goldenberg,<sup>13</sup> Celestia S. Higano,<sup>13</sup> Maria Spillane,<sup>13</sup>  
11 Eugenia Wu,<sup>13</sup> H. Ballentine Carter,<sup>14</sup> Christian P. Pavlovich,<sup>14</sup> Mufaddal Mamawala,<sup>14</sup> Tricia  
12 Landis,<sup>14</sup> Peter R. Carroll,<sup>15</sup> June M. Chan,<sup>1,15</sup> Matthew R. Cooperberg,<sup>15,16</sup> Janet E. Cowan,<sup>15</sup>  
13 Todd M. Morgan,<sup>17</sup> Javed Siddiqui,<sup>18</sup> Rabia Martin,<sup>18</sup> Eric A. Klein,<sup>19</sup> Karen Brittain,<sup>19</sup> Paige  
14 Gotwald,<sup>19</sup> Daniel A. Barocas,<sup>20</sup> Jeremiah R. Dallmer,<sup>20,21</sup> Jennifer B. Gordetsky,<sup>20,22</sup> Pam  
15 Steele,<sup>20</sup> Shilajit D. Kundu,<sup>2</sup> Jazmine Stockdale,<sup>2</sup> Monique J. Roobol,<sup>23</sup> Lionne D.F.  
16 Venderbos,<sup>23</sup> Martin G. Sanda,<sup>24</sup> Rebecca Arnold,<sup>24</sup> Dattatraya Patil,<sup>24</sup> Christopher P. Evans,<sup>25</sup>  
17 Marc A. Dall'Era,<sup>25</sup> Anjali Vij,<sup>25</sup> Anthony J. Costello,<sup>26</sup> Ken Chow,<sup>26</sup> Niall M. Corcoran,<sup>26</sup> Soroush  
18 Rais-Bahrami,<sup>27,28</sup> Courtney Phares,<sup>27</sup> Douglas S. Scherr,<sup>29</sup> Thomas Flynn,<sup>29</sup> R. Jeffrey  
19 Karnes,<sup>30</sup> Michael Koch,<sup>31</sup> Courtney Rose Dhondt,<sup>31</sup> Joel B. Nelson,<sup>32</sup> Dawn McBride,<sup>32</sup> Michael  
20 S. Cookson,<sup>33</sup> Kelly L. Stratton,<sup>33</sup> Stephen Farriester,<sup>33</sup> Erin Hemken,<sup>33</sup> Walter M. Stadler,<sup>34</sup>  
21 Tuula Pera,<sup>34</sup> Deimante Banionyte,<sup>34</sup> Fernando J. Bianco Jr.,<sup>35</sup> Isabel H. Lopez,<sup>35</sup> Stacy Loeb,<sup>36</sup>  
22 Samir S. Taneja,<sup>36</sup> Nataliya Byrne,<sup>36</sup> Christopher L. Amling,<sup>37</sup> Ann Martinez,<sup>37</sup> Luc Boileau,<sup>37</sup>  
23 Franklin D. Gaylis,<sup>38</sup> Jacqueline Petkewicz,<sup>39</sup> Nicholas Kirwen,<sup>39</sup> Brian T. Helfand,<sup>39</sup> Jianfeng  
24 Xu,<sup>39</sup> Denise M. Scholtens,<sup>3</sup> William J. Catalona,<sup>2,42</sup> John S. Witte<sup>1,15,16,40,42</sup>

25

26 **Author Affiliations:**

27 <sup>1</sup>Department of Epidemiology and Biostatistics, University of California, San Francisco, San Francisco, CA  
28 94158, USA

29 <sup>2</sup>Department of Urology, Northwestern University Feinberg School of Medicine, Chicago, IL 60611, USA

30 <sup>3</sup>Division of Biostatistics, Department of Preventive Medicine, Northwestern University Feinberg School of  
31 Medicine, Chicago, IL 60611, USA

32 <sup>4</sup>Fred Hutchinson Cancer Research Center, Cancer Prevention Program, Public Health Sciences, Seattle,  
33 WA 98109, USA

34 <sup>5</sup>Department of Urology, University of Washington, Seattle 98195, WA, USA

35 <sup>6</sup>Fred Hutchinson Cancer Research Center, Cancer Epidemiology Program, Public Health Sciences,  
36 Seattle, WA 98109, USA

37 <sup>7</sup>Department of Epidemiology, University of Washington, School of Public Health, Seattle, WA 98195, USA

38 <sup>8</sup>Division of Urology, Department of Surgery, Princess Margaret Cancer Centre, University Health Network,  
39 Toronto, Ontario, Canada

40 <sup>9</sup>Urology Service, Department of Surgery, Memorial Sloan Kettering Cancer Center, New York, NY, USA

41 <sup>10</sup>Departments of Genitourinary Medical Oncology and Urology, University of Texas M.D. Anderson Cancer  
42 Center, Houston, TX, USA

43 <sup>11</sup>Department of Urology, David Geffen School of Medicine at UCLA, USA

44 <sup>12</sup>Odette Cancer Centre, Sunnybrook Health and Sciences Centre, University of Toronto, Toronto, ON,  
45 Canada

46 <sup>13</sup>Department of Urologic Sciences, University of British Columbia, Vancouver, BC, Canada

47 <sup>14</sup>Brady Urological Institute, Johns Hopkins University School of Medicine, Baltimore, MD, USA

48 <sup>15</sup>Department of Urology, University of California, San Francisco, San Francisco, CA, USA

49 <sup>16</sup>Helen Diller Family Comprehensive Cancer Center, University of California, San Francisco, San  
50 Francisco, CA, USA

51 <sup>17</sup>Department of Urology, University of Michigan, Ann Arbor, MI, USA

52 <sup>18</sup>Department of Pathology, University of Michigan, Ann Arbor, MI, USA

53 <sup>19</sup>Glickman Urological and Kidney Institute, Cleveland Clinic Lerner College of Medicine, Cleveland Clinic,  
54 USA

55 <sup>20</sup>Department of Urology, Vanderbilt University Medical Center, Nashville, TN, USA

56 <sup>21</sup>Department of Urology, Cedars-Sinai Medical Center, Los Angeles, CA, USA

57 <sup>22</sup>Department of Pathology, Microbiology, and Immunology, Vanderbilt University Medical Center, Nashville,  
58 TN, USA

59 <sup>23</sup>Department of Urology, Erasmus Cancer Institute, Erasmus University Medical Center, Rotterdam, the  
60 Netherlands

61 <sup>24</sup>Department of Urology, Emory University School of Medicine, Atlanta, GA, USA

62 <sup>25</sup>Department of Urologic Surgery, University of California, Davis Medical Center, Sacramento, CA, USA

63 <sup>26</sup>Department of Urology, Royal Melbourne Hospital and University of Melbourne, Australia

64 <sup>27</sup>Department of Urology, University of Alabama at Birmingham, Birmingham, AL, USA

65 <sup>28</sup>Department of Radiology, University of Alabama at Birmingham, Birmingham, AL, USA

66 <sup>29</sup>Department of Urology, Weill Cornell Medicine, New York-Presbyterian Hospital, New York, NY, USA

67 <sup>30</sup>Mayo Clinic Department of Urology, Rochester, MN, USA

68 <sup>31</sup>Department of Urology, Indiana University School of Medicine, Indianapolis, IN, USA

69 <sup>32</sup>Department of Urology, University of Pittsburgh School of Medicine, PA, USA

70 <sup>33</sup>Department of Urology, University of Oklahoma Health Sciences Center, Oklahoma City, OK, USA

71 <sup>34</sup>University of Chicago Comprehensive Cancer Center, Chicago, IL, USA

72 <sup>35</sup>Urological Research Network, Miami Lakes, FL, USA

73 <sup>36</sup>Departments of Urology and Population Health, New York University Langone Health and Manhattan  
74 Veterans Affairs Medical Center, New York, NY, USA

75 <sup>37</sup>Department of Urology, Oregon Health and Science University, Portland, OR, USA

76 <sup>38</sup>Genesis Healthcare Partners, Department of Urology, University of California, San Diego, CA, USA

77 <sup>39</sup>Division of Urology, NorthShore University Health System, Evanston, IL, USA

78 <sup>40</sup>Departments of Epidemiology and Population Health, Biomedical Data Science, and Genetics, Stanford  
79 University, Stanford, CA, USA

80 <sup>41</sup>These authors contributed equally to the first authorship.

81 <sup>42</sup>These authors contributed equally to the senior authorship.

82

83 Correspondence to John S. Witte (jswitte@stanford.edu)

84

85 **Descriptive running head:** Genetics of prostate cancer conversion from active surveillance

86 **Keywords (MeSH Headings):** prostatic neoplasms; prostate; genome-wide association study,

87 genetics

88 **Support:** NIH grant P50CA180995; CIDR Contract # HHSN268201700006I

89 **Abstract**

90 Men diagnosed with low-risk prostate cancer (PC) are increasingly electing active surveillance  
91 (AS) as their initial management strategy. While this may reduce the side effects of treatment for  
92 prostate cancer, many men on AS eventually convert to active treatment. PC is one of the most  
93 heritable cancers, and genetic factors that predispose to aggressive tumors may help  
94 distinguish men who are more likely to discontinue AS. To investigate this, we undertook a  
95 multi-institutional genome-wide association study (GWAS) of 6,361 PC patients who initially  
96 elected AS and were followed over time for the potential outcome of conversion from AS to  
97 active treatment. In the GWAS we detected 18 single nucleotide polymorphisms (SNPs)  
98 associated with conversion, 15 of which were not previously associated with PC risk. We found  
99 two genes associated with conversion (*MAST3*,  $p = 6.9 \times 10^{-7}$  and *GAB2*,  $p = 2.0 \times 10^{-6}$ ).  
100 Moreover, increasing values of a previously validated 269-SNP genetic risk score (GRS) for PC  
101 was positively associated with conversion (e.g., comparing the highest to the two middle deciles  
102 gave a hazard ratio [HR] = 1.13; 95% Confidence Interval [CI]= 0.94-1.36); whereas, decreasing  
103 values of a 36-variant GRS for prostate-specific antigen (PSA) levels were positively associated  
104 with conversion (e.g., comparing the lowest to the two middle deciles gave a HR = 1.25; 95%  
105 CI, 1.04-1.50). These results suggest that germline genetics may help inform and individualize  
106 the decision of AS—or the intensity of monitoring on AS—*versus* treatment for the initial  
107 management of patients with low-risk PC.

108 **Introduction**

109 Active surveillance (AS) is now more widely implemented as an initial management strategy for  
110 many men with lower-risk prostate cancer (PC [MIM: 176807])<sup>1</sup>. PC that is unlikely to invade  
111 surrounding tissue or metastasize according to characteristics at diagnosis is considered “low-  
112 risk” or “favorable-intermediate risk”<sup>2</sup>. Recent work in the United States Veterans Administration  
113 (VA) Health Care System<sup>3,4</sup> and in Sweden<sup>5</sup> indicates that a majority of men with low-risk PC  
114 are being managed with AS. Determining which patients most benefit from early active  
115 treatment *versus* AS, however, and how intensive the surveillance protocol should be, remains  
116 a challenge.

117

118 A major drawback of AS for low-risk PC is the possibility of misclassifying patients with life-  
119 threatening disease. In fact, over a 10-year follow-up period, 20-40% of men initially managed  
120 with AS later have more aggressive cancer<sup>6</sup>. While the impact of delayed treatment is unknown,  
121 up to 50% of men in one AS series of studies experienced biochemical recurrence after active  
122 treatment<sup>7</sup>. These uncertainties and challenges in accurately discriminating between indolent  
123 and aggressive PC may prompt men to err on the side of early treatment resulting in  
124 unnecessary side effects and worse health-related quality of life, or conversely result in delays  
125 in therapy for men who are likely to benefit from it. Many men have such low-risk disease that  
126 they do not need the biopsies or scans with the frequency with which they have typically been  
127 performed. Recent work suggests that the likelihood of risk reclassification of an individual  
128 patient’s disease might be predicted for at least four years of AS<sup>8</sup>. Thus, it may be possible  
129 reduce the intensity of surveillance for many men with the lowest-risk tumors.

130

131 A key outstanding question is how to best distinguish among low- and high-risk tumors for AS  
132 decisions. Promising recent developments for enhancing clinical risk assessment include multi-  
133 parametric MRI with targeted prostate biopsy and tissue-based genomic testing<sup>9,10</sup>. Another

134 potentially valuable approach is incorporating germline genetic information for PC via a  
135 polygenic risk score<sup>11</sup>. PC is one of the most heritable of common cancers, with germline  
136 genetic factors accounting for over 40% of the variability in this disease<sup>12–15</sup>. We and others  
137 have identified from genome-wide association studies (GWAS) 269 common germline genetic  
138 variants associated with PC susceptibility that explain a substantial proportion of disease  
139 heritability<sup>16–43</sup>. Combining these PC risk variants together into a genetic risk score (GRS) may  
140 provide a more discriminatory biomarker not only for PC risk, but also potentially for predicting  
141 conversion from AS to treatment<sup>44–47</sup>. Moreover, we recently have discovered genetic variants  
142 that explain variability in PSA levels<sup>48</sup>. Since PSA is a critical component to monitoring men  
143 undergoing AS, incorporating this information may also help to identify ideal AS candidates.  
144

145 To evaluate the potential value of incorporating germline genetic information into the shared  
146 decision-making process for AS, we present findings from a large, multi-institutional GWAS of  
147 men diagnosed with PC enrolled in an AS program. We report novel variants and genes, and  
148 genetic risk scores associated with conversion from AS to treatment.  
149

149

## 150 **Material and Methods**

### 151 *Participants*

152 The primary study participants came from 28 institutions in the US, Canada, the Netherlands,  
153 and Australia. We recently reported on the clinicopathological characteristics of conversion to  
154 treatment in this population<sup>49</sup>. The initial study population included 7,279 men diagnosed with  
155 PC between 1991 and 2018 who elected AS for their initial management. We also included an  
156 additional 593 AS patients from the University of Texas MD Anderson Cancer Center as  
157 replication samples, described below. Patients' blood or tissue samples were collected to  
158 conduct germline genetic analyses. The AS protocols varied among participating institutions,  
159 reflecting real-world practice patterns<sup>50–53</sup>, and we did not impose strict inclusion/exclusion

160 criteria based on the AS protocol. Patient demographic and clinical variables were collected and  
161 managed using the Research Electronic Data Capture (REDCap) software<sup>54,55</sup>. Men without  
162 data on the duration of AS (235, 3.2%) and those managed with AS for less than six months  
163 (269, 3.7%) were excluded, leaving 6,775 men for potential inclusion in the GWAS. This study  
164 was approved by the institutional review board at each institution, all participants provided  
165 written informed consent, and all participating institutions signed a material transfer and data  
166 use agreement.

167

### 168 *Clinical and Demographic Factors*

169 We collected PC characteristics at diagnosis, including the age at diagnosis, Gleason grade  
170 group (GG), PSA level, clinical tumor stage (cT), and the number of cancerous biopsy cores at  
171 diagnosis. Grade groups correspond to the following Gleason scores (GS): GG1 ~ GS  $\leq 6$ ; GG2  
172 ~ GS 3+4; GG3 ~ GS 4+3; GG4 ~ GS 8; GS 5 ~ GS 9 or 10<sup>56</sup>. Study participants were classified  
173 into three risk groups (low-, intermediate-, and high-risk) based on our modification of guidelines  
174 from the National Comprehensive Cancer Network (NCCN) and the American Urological  
175 Association (AUA). We did not strictly follow these guidelines because we were unable to  
176 distinguish between cT2a, cT2b, and cT2c, and we did not have data on PSA density (serum  
177 PSA concentration divided by prostate volume). Therefore, *low-risk* patients met the following  
178 criteria: Gleason grade group 1 (GG1) (Gleason score 3+3), PSA <10 ng/mL, clinical-stage cT1,  
179 and  $\leq 3$  positive biopsy cores. *Intermediate-risk* patients had any of the following without any  
180 high-risk or high-volume criteria: GG2 (Gleason 3+4), PSA 10-20 ng/mL, or stage cT2. *High-risk*  
181 patients had any of the following:  $\geq$  GG3 ( $\geq$  Gleason 4+3), PSA  $\geq 20$  ng/mL, stage  $\geq$  cT3, or  $\geq 4$   
182 positive biopsy cores of any GG.

183

184 Conversion occurred when a patient received treatment following AS. The reason for  
185 withdrawing from AS to begin treatment was reported as due to “upgrading”, “upstaging”, “PSA



186 progression”, “anxiety”, and/or “other” reasons. Note that in our survival analysis (below),  
187 individuals who converted due to anxiety were censored and do not contribute events in our  
188 analysis. We used the ADMIXTURE software program to infer genetic ancestry from  
189 uncorrelated SNPs, according to major reference populations in the 1000 Genomes Project  
190 (European, African, East/South Asian combined, and Admixed American)<sup>57</sup>.

191

### 192 *Genotyping and Imputation*

193 In total, 6,324 participants were genotyped on the Illumina Infinium Multi-Ethnic Global Array  
194 (MEGA), including custom content, at the NIH Center for Inherited Disease Research (CIDR) at  
195 Johns Hopkins University. Genotypes were called using GenomeStudio version 2011.1,  
196 Genotyping Module version 1.9.4, and GenTrain Version 1.0. The full array with custom content  
197 consisted of 1,760,143 SNPs.

198

199 After genotyping, the median SNP call rate was 99.94%, and the error rate estimated from 122  
200 pairs of planned study duplicates was  $1.3 \times 10^{-6}$ . Samples and variants were excluded if they had  
201 a sample or genotyping call rate  $< 98\%$ . We limited our analyses to variants with a minor allele  
202 frequency (MAF)  $\geq 1\%$ . Variants were screened for deviations from Hardy-Weinberg equilibrium  
203 with a filter threshold of  $p = 6.5 \times 10^{-4}$ . A total of 856,077 genotyped SNPs remained after these  
204 quality control (QC) steps. Unmeasured genetic variants were imputed using the Trans-Omics  
205 for Precision Medicine (TOPMed) Imputation Server, with 97,256 reference samples and  
206 308,107,085 SNPs. Variants with imputation quality (INFO) score  $< 0.3$  were excluded, leaving  
207 a total of 22,691,641 SNPs successfully imputed. After QC steps, a total of 5,936 samples  
208 genotyped at CIDR remained for inclusion in the GWAS.

209

210 Furthermore, we included in our analysis an additional 593 AS patients from MD Anderson  
211 previously genotyped on the Illumina Infinium OncoArray-500K BeadChip Array. This array was

212 primarily developed to study cancer predisposition and risk. Genotypes were called using  
213 GenomeStudio version 2011.1. The full array consisted of 500,000 SNPs. Genotype QC  
214 procedures and imputation for the PRACTICAL OncoArray have been described previously<sup>15</sup>.  
215 Briefly, imputation was performed without pre-phasing with SHAPEIT2 based on the 1000  
216 Genomes Phase 3 release reference panel. In total, 21,299,194 SNPs were successfully  
217 imputed, and 10,109,977 variants with  $MAF \geq 1\%$  on autosomal chromosomes 1-22 and sex  
218 chromosome X.

219

#### 220 *GWAS of Conversion from AS to Treatment*

221 The variants with  $MAF \geq 1\%$  on autosomal chromosomes 1-22 and sex chromosome X were  
222 tested for their association with time to conversion from AS to treatment among the 5,222 men  
223 of European genetic ancestry genotyped by CIDR. Patients who converted due to anxiety were  
224 censored because the event of interest was converting due to a change in the cancer clinical  
225 characteristics. Per-allele hazard ratios (HRs), 95% confidence intervals (CIs), and  
226 corresponding p-values were calculated from Cox proportional hazards models. HRs were  
227 adjusted for age at diagnosis and the first 10 genetic principal components to address potential  
228 population stratification or cryptic relatedness. Adjusted HRs were calculated using the  
229 gwasurvivr package in R<sup>58</sup>. For any variants associated with conversion, we examined the Cox  
230 models' proportional hazards assumption.

231

232 Following the GWAS discovery phase, the potential associations were tested for replication in  
233 an independent GWAS among 1,139 men also genotyped by CIDR (but of non-European  
234 ancestry) and the 425 MD Anderson samples of European genetic ancestry (excluding other  
235 ancestries). Again, variants with  $MAF \geq 1\%$  on autosomal chromosomes and sex chromosome  
236 X were tested for their association with conversion within major ancestral populations (i.e.,  
237 European, African, Asian, and Admixed American). For the MD Anderson patients, 9,962,324

238 variants were tested in a Cox proportional hazards model adjusted for age at PC diagnosis and  
239 ancestry principal components.

240

241 Results from the GWAS were combined with a fixed-effects inverse-variance-weighted meta-  
242 analysis using METAL<sup>59</sup>. All statistical tests were two-sided. Marginal P values less than  $5 \times 10^{-8}$   
243 were considered statistically significant. We defined a locus as the 1 megabase (Mb) region  
244 surrounding the sentinel variant (500 kilobase pairs flanking each side). To identify  
245 independently associated variants, within each 1 Mb region we performed clumping on the  
246 association results using PLINK v1.9 using a linkage disequilibrium threshold  $r^2 < 0.5$ .

247

#### 248 *Transcriptome-Wide Association Study of Conversion from AS to Treatment*

249 To identify additional genes associated with time to conversion, we conducted a transcriptome-  
250 wide association analysis (TWAS), which models genetically imputed transcript levels and has a  
251 lower multiple testing burden compared to single-variant analysis. We applied the MetaXcan  
252 analytic pipeline to our GWAS summary statistics and associated genetically predicted  
253 expression of approximately 22,000 genes across 49 tissue reference datasets from GTEx  
254 (version 8)<sup>60</sup>. Tissue-specific associations were aggregated using S-MultiXcan to obtain cross-  
255 tissue p-values for each gene<sup>60</sup>. Associations were considered statistically significant at the  
256 Bonferroni-corrected alpha level of  $2.2 \times 10^{-6}$  (i.e.,  $0.05/22,535$  genes).

257

#### 258 *Genetic Risk Scores*

259 Genetic risk scores (GRS) were constructed by summing variant-specific weighted allelic  
260 dosages for the samples genotyped by CIDR. The initial GRS included the 269 PC risk variants  
261 reported in the largest trans-ancestry GWAS meta-analysis of PC<sup>43</sup>. Specifically, for patient  $i$ ,  
262  $GRS_i = \sum_{m=1}^M w_m g_{im}$ , where  $g_{im}$  is the genotype dosage for patient  $i$ , and variant  $m$ , and  $w_m$  is  
263 the variant weight on the log odds ratio scale from the published literature (i.e., the meta-

264 analysis for the  $GRS_{PC}$ ).  $M$  is the total number of variants included in the GRS ( $M = 269$  for the  
265  $GRS_{PC}$ ). A second GRS was developed for the genetic basis of serum PSA levels. This  $GRS_{PSA}$   
266 included 36 variants and their corresponding weights from a GWAS of PSA levels among  
267 cancer-free men.<sup>48</sup> The associations between these GRS and conversion were estimated using  
268 multivariable Cox proportional hazards models. Minimally adjusted Cox models included age  
269 and the first 10 genetic principal components. Fully adjusted Cox models also included Gleason  
270 grade group (GG1, GG2, or  $\geq$  GG3); PSA concentration (ng/mL); clinical stage (cT1, cT2, or  
271 cT3/cT4); and number of positive biopsy cores (1-2, 3, or  $\geq$  4). The GRS was modeled as a  
272 categorical variable according to deciles of the distribution, and HRs for each decile were  
273 estimated with the 40-60th percentile group as the reference.

274

#### 275 *Clinical Utility of the GRS*

276 The potential utility of the GRS was evaluated by comparing how the top and bottom deciles of  
277 the GRS distribution modified conversion rates within the three PC clinicopathological risk  
278 categories (i.e., low-, intermediate-, and high-). For the top and bottom GRS deciles (top 10<sup>th</sup>  
279 percentile and bottom 10<sup>th</sup> percentile, respectively) we plotted Kaplan–Meier curves of  
280 conversion within each PC clinicopathological risk category and tested the difference between  
281 each pair of curves with the log-rank test.

282

283 To evaluate the overall discriminative capacity of the GRS (i.e., not just the decile tails), we  
284 calculated the area under the ROC Curve (AUC) in the discovery sample using regression  
285 models of time to conversion. We used Chambless and Diao’s estimator of cumulative AUC for  
286 right-censored time-to-event data, which is a summary measure given by the integral of AUC on  
287  $[0, \max(\text{times})]$  weighted by the estimated probability density of the time-to-event outcome<sup>61</sup>. A  
288 baseline AUC was calculated for the model that included age and the first 10 principal  
289 components. This model was then expanded to further include PC clinical characteristics listed

290 above for the multivariable Cox model, followed by  $GRS_{PC}$  and  $GRS_{PSA}$  (individually and  
291 together).

292

## 293 **Results**

### 294 *Study Population*

295 Details of the discovery and replication samples that met inclusion criteria are presented in  
296 **Table S1**. Clinically, most men had low-risk PC (3,639, 70%) and/or features of low-risk, low-  
297 volume disease: GG1 (4,819, 92%), 1-2 positive biopsy cores (4,113, 79%), and a median PSA  
298 at diagnosis of 5 ng/mL. Using genetic information to infer ancestry, 88% were classified as  
299 European ancestry. The demographic and clinicopathological characteristics of the replication  
300 samples had a similar pattern as the discovery samples, except that the proportion of high-risk  
301 PC was higher for men of Asian genetic ancestry ( $n = 43$ ; 18%) than of European ancestry ( $n =$   
302 599; 11%); **Table S1**). Baseline characteristics were missing for the following proportion of  
303 study participants: age at diagnosis (<0.1%), GG group (<0.1%), PSA concentration (3.3%),  
304 clinical tumor stage (6.9%), number of positive biopsy cores (2.5%), and risk-group classification  
305 (<0.1%).

306

### 307 *Genome-Wide Association Study of Conversion from AS to Treatment*

308 Our approach to the GWAS discovery, replication, and meta-analysis is outlined in **Figure 1**.  
309 The median follow-up time for patients in this multicenter study was 6.7 years. Of the 2,260  
310 patients who converted from AS to treatment, 126 (5.6%) converted due to anxiety and were  
311 censored in our time-to-event analyses. Our primary discovery GWAS yielded 14 independent  
312 lead SNPs (i.e.,  $p$ -value  $< 5 \times 10^{-8}$  at each locus of size 1Mb) (**Figure 2a**). We replicated 1 of the  
313 signals at a  $p$ -value level less than  $0.05/14$  ( $\approx 0.0036$ ) in the replication meta-analysis. In the  
314 combined meta-analysis of discovery and replication GWAS, we detected four additional SNPs  
315 independently associated with conversion to treatment (**Figure 2b**). Q-Q plots for the discovery

316 GWAS and the combined meta-analysis did not suggest inflation of test statistics due to  
317 systematic bias such as population substructure (genomic inflation factor =1 and 1.02,  
318 respectively; **Figure S1**).

319  
320 Of the 18 SNPs, four were common (MAF > 0.01) and the remainder were low frequency (MAF  
321 = 0.01) (**Table 1**). Three were located within 1 Mb of previous PC GWAS-identified variants,  
322 although they were not in linkage disequilibrium with these variants ( $r^2 < 0.3$ ). These were:  
323 intronic SNP rs4721243 of *MAD1L1* (MIM: 602686) on chromosome 7 (CIDR European GWAS  
324  $HR = 5.65$ ,  $P = 7 \times 10^{-10}$ ); rs1404610 near *GLI2* (MIM: 165230; combined meta-analysis  $HR =$   
325  $3.74$ ,  $P = 5.4 \times 10^{-10}$ ) on chromosome 2; and rs74874116 near *GATA5* (MIM: 611496; CIDR  
326 European  $HR = 2.67$ ,  $P = 1.47 \times 10^{-9}$ ) on chromosome 20.

327  
328 *Transcriptome-Wide Association Study of Conversion from AS to Treatment*

329 In the multi-tissue TWAS analysis using S-MultiXcan, the imputed expression levels of two  
330 genes were associated with conversion after Bonferroni correction for multiple testing: *MAST3*  
331 (MIM: 612258; P-value= $6.9 \times 10^{-7}$ ) and *GAB2* (MIM: 606203; P-value= $2.0 \times 10^{-6}$ ). Imputed  
332 expression levels of two other genes suggested association with conversion: *ARRDC2* (P-  
333 value= $2.7 \times 10^{-5}$ ) and *CELSR1* (MIM: 604523; P-value= $9.5 \times 10^{-5}$ ). When looking only at  
334 prostate tissue, we observed modest associations for *MAST3* (P-value=0.08) and *GAB2* (P-  
335 value= $4.1 \times 10^{-4}$ ), as well as a suggestive association between imputed expression of the gene  
336 *ZNF644* (MIM: 614159) and conversion (P-value= $9.9 \times 10^{-5}$ ).

337  
338 *Genetic Risk Scores and Conversion from AS to Treatment*

339 Increasing GRS for PC susceptibility ( $GRS_{PC}$ ) was positively associated with conversion from  
340 AS to treatment, even after adjusting for clinical covariates (**Figure 3a**; **Table S2**). The fully

341 adjusted HR for conversion for men in the top decile of the  $GRS_{PC}$  compared to the middle two  
342 deciles was 1.13 (95% CI, 0.94-1.36; **Figure 3a; Table S2**). Men in the bottom 10<sup>th</sup> percentile of  
343 the  $GRS_{PC}$  distribution had a significantly lower conversion rate than the middle two deciles of  
344 the  $GRS_{PC}$  (HR=0.69; 95% CI, 0.56-0.86; **Figure 3a; Table S2**).

345

346 From the 36-variant GRS for PSA concentration ( $GRS_{PSA}$ ), we observed the opposite pattern:  
347 increasing  $GRS_{PSA}$  was inversely associated with conversion (**Figure 3b; Table S3**). Compared  
348 to the 40-60<sup>th</sup> percentiles, men in the bottom 10<sup>th</sup> percentile of the PSA GRS distribution  
349 experienced a shorter time to conversion (fully adjusted HR=1.25; 95% CI, 1.04-1.50; **Figure**  
350 **3b; Table S3**).

351

### 352 *Potential Clinical Utility of the GRS*

353 The time to conversion in the low- and intermediate-risk groups varied depending on whether  
354 men were in the top or bottom deciles of the  $GRS_{PC}$  and  $GRS_{PSA}$  distributions (**Figure 4**). For  
355  $GRS_{PC}$ , the Kaplan-Meier curves contrasting the top *versus* bottom deciles were significantly  
356 different for the low- and intermediate-risk groups ( $p=3 \times 10^{-5}$  and  $p=0.016$ , respectively).  
357 Similarly, the top and bottom deciles of the  $GRS_{PSA}$  differed for the intermediate-risk groups  
358 ( $p=0.003$ ). There was no clear difference between the deciles of  $GRS_{PC}$  or  $GRS_{PSA}$  in patients  
359 with high-risk disease.

360

361 A baseline model including age at diagnosis and principal components achieved an AUC = 0.55  
362 for time to conversion. This was substantially improved by incorporating the clinical  
363 characteristics into the model: AUC = 0.653 (**Table S4**). Adding the  $GRS_{PC}$  to this model  
364 resulted in modest improvement (AUC=0.659). Augmenting this model with  $GRS_{PSA}$  produced  
365 minimal improvement (AUC = 0.661).

366

367 **Discussion**

368 In this GWAS of PC patients managed with AS, we detected 18 novel SNPs and two candidate  
369 genes associated with conversion. We further found that GRS for PC susceptibility in addition to  
370 PSA level were associated with conversion, providing information beyond conventional clinical  
371 and pathologic measures of the disease. These findings provide preliminary support for using  
372 germline genetic information to inform the initial management of men with newly diagnosed,  
373 clinically localized PC.

374

375 Of the 18 SNPs associated with conversion, 15 were not previously associated with PC risk.  
376 These include a low-frequency (MAF = 0.01) intronic variant, rs4721243 at *MAD1L1*, at a  
377 previously identified PC locus<sup>43</sup>. The SNP was uncorrelated with the previously reported  
378 genome-wide significant PC SNP at the locus (rs4513875,  $r^2 = 0.012$  in the 1000 Genomes  
379 global reference data). One detected SNP (rs74874116) was 32kb away from a PC-associated  
380 indel (rs139135938), with little correlation ( $r^2 = 0.015$  in 1000 Genomes). The neighboring  
381 gene, *GATA5*, encodes a transcription factor that contains two GATA-type zinc fingers and is  
382 required during cardiovascular development<sup>62</sup>. This gene contains two variants previously  
383 associated with benign prostatic hyperplasia (MIM: 600082) and associated lower urinary tract  
384 symptoms<sup>63</sup> (MIM: 618612). Another SNP in a PC risk locus was rs1404610, nearby *GLI2*, a  
385 transcription factor that one study found regulates the growth and tumorigenicity of prostate  
386 cells<sup>64</sup>.

387

388 Many of the novel SNPs we found to be associated with conversion are intronic, including SNPs  
389 in genes involved in cellular signaling, growth, and differentiation. *PRDM16* (MIM: 605557),  
390 where rs6658664 is located, is associated with evasion of apoptosis by prostatic cancer cells<sup>65</sup>.  
391 Intronic SNP rs115861550 in *VAV2* (MIM: 600428) is upregulated in human PC tumors and is a  
392 prognostic indicator for poor outcome<sup>66</sup>. Another intronic SNP, *EBF3* (MIM: 607407), has been



393 shown to regulate the expression of genes involved in cell growth, proliferation, and apoptosis<sup>67</sup>.  
394 *RECQL5* (MIM: 603781), where SNP rs820198 is located, regulates DNA repair intermediate  
395 structures, and studies have observed elevated *RECQL5* expression in other cancers such as  
396 breast (MIM: 114480) and bladder (MIM: 109800)<sup>68–70</sup>. SNP rs820198 is annotated to an active  
397 CTCF (CCCTC-binding factor) binding site, and CTCF expression is linked to poor outcome in  
398 prostate cancer<sup>71</sup>. Although intergenic, SNP rs77112978 is near *NEDD4L* (MIM: 606384),  
399 whose expression is decreased in PC<sup>72</sup>. Intergenic SNP rs55850837-A, associated with  
400 conversion in our study, was associated with reduced body mass index<sup>73</sup> and body fat  
401 percentage<sup>74</sup> in the phenome-wide association data curated by the IEU OpenGWAS Project<sup>75</sup>.  
402 SNP rs12452625, a UTR'3 variant of *RFNG* (MIM: 602578) gene, is correlated with variants  
403 associated with multiple traits, including heel bone mineral density, lung function, and waist-hip  
404 ratio<sup>76,77</sup>. This SNP is also predicted to be a functional target of microRNA hsa-miR-629-3p,  
405 which may serve as a biomarker for lung metastases of triple-negative breast cancer<sup>78</sup>.  
406  
407 Our TWAS suggests a possible role for *MAST3* and *GAB2* in conversion. A study described  
408 *MAST3* as an inflammatory bowel disease (IBD) susceptibility gene that regulates NF-κB  
409 activity through TLR4<sup>79</sup>. Two recent studies have described increased risk for PC in men with  
410 IBD (MIM: 601458)<sup>80,81</sup>. Regarding *GAB2*, the knockdown of this gene in PC cells altered the  
411 expression of over 1,200 genes and inhibited p53 signaling<sup>82</sup>.  
412  
413 We found that the PC GRS based on 269 known risk variants was positively associated with  
414 conversion. Moreover, a PSA GRS based on 36 known genetic variants for PSA levels exhibited  
415 a weak inverse association with conversion. We expected these GRS to have opposite  
416 directions of effect on conversion, given that the PSA GRS may reflect the potential  
417 ascertainment of higher-risk PC in men with lower genetically predicted PSA levels. While the

418 overall GRS only contributed modest model discrimination beyond established risk factors for  
419 conversion, the associations observed in the tails (i.e., deciles) of the GRS distribution were  
420 most pronounced among men in low and intermediate clinicopathological categories. This  
421 finding suggests that men with lower-risk disease, but high PC GRS (or low PSA GRS) may be  
422 more likely candidates for early treatment or possibly a higher intensity of surveillance. A recent  
423 study of European ancestry men with low-risk PC managed on AS reported associations  
424 between higher PC GRS with more positive cores and with bilateral tumor location at diagnostic  
425 and surveillance biopsy<sup>83</sup>; note that ~50% of the men in this previous study are also included  
426 here, comprising ~10% of our study population.

427

428 Strengths of this study include leveraging a large, multi-institutional collaborative study of AS to  
429 model the effects of genetic risk variants independent of clinical risk parameters. Sixty-three  
430 percent of the replication sample (n = 714) were men of non-European genetic ancestry,  
431 allowing us to test the generalizability of the SNPs discovered in the European sample. Our  
432 GRS included the most recently available GWAS weights from PC and PSA. Limitations of our  
433 study included the lack of confirmatory or surveillance biopsies to reduce misclassification of  
434 clinical parameters at diagnosis and follow-up. In addition, conversion could conflate disease  
435 progression with patient anxiety and/or physician preference for AS management. However,  
436 discontinuing AS due to anxiety was relatively uncommon in this study (about 6% of events),  
437 and these cases were censored in the GWAS analysis. Furthermore, given the relatively short  
438 follow-up for more robust PC outcomes, the sample sizes for PSA failure after treatment  
439 (n=124), metastases (n=29), or PC-specific death (n=11) are too small for a GWAS analysis.

440

441 In summary, we have undertaken the first GWAS of conversion among men diagnosed  
442 with PC. This multi-institutional study detected a genetic basis of conversion, suggesting

443 that genetic factors may provide valuable information to stratify men with PC by their  
444 risk of discontinuing AS. Important future work will expand this study to more men  
445 placed on AS, increasing our ability to detect genetic variants associated with  
446 conversion. This may in turn help address concerns that biopsy sampling may  
447 underestimate a tumor's aggressiveness and provide a more personalized approach to  
448 decisions surrounding AS.

449 **Supplemental Data**

450 Supplemental data include one figure and four tables.

451

452 **Disclosures of Interests**

453 The authors declare no competing interests.

454

455 **Declarations**

456 This study was approved by the Robert H. Lurie Comprehensive Cancer Center of Northwestern  
457 University Scientific Review (IRB) Committees. The approval number is STU00077147, which  
458 was most recently given annual approval on 7/8/2021.

459

460 **Acknowledgements**

461 **Funding/Support:** P50CA180995 (William J. Catalona) 08/01/15 – 07/31/20 NIH/NCI SPORE  
462 in Prostate Cancer PI on the SPORE grant, Center for Inherited Disease Research (CIDR)  
463 award from the NCI for patient sample genotyping (X01HG009642), Urological Research  
464 Foundation (William J. Catalona), NorthShore University Health System, Evanston, IL, USA  
465 (Brian T. Helfand). Additional support was provided by award numbers R01CA158627 and  
466 R01CA195505 (Leonard S. Marks), P50 CA186786 (Todd M. Morgan), UL1 TR000445 from  
467 NCATS/NIH for Vanderbilt REDCap (Daniel A. Barocas), P50 CA097186 and K05 CA175147  
468 (Janet L. Stanford), and U01 CA113913 (Martin G. Sanda) from the National Institute of Health,  
469 and W81XWH-13-2-0074 (Peter R. Carroll) from the Department of Defense.

470

471 **Web Resources**

472 METAL ([https://genome.sph.umich.edu/wiki/METAL\\_Documentation](https://genome.sph.umich.edu/wiki/METAL_Documentation))

473 PLINK v1.9 (<https://www.cog-genomics.org/plink/>)

474 MetaXcan, S-MetaXcan (<https://github.com/hakyimlab/MetaXcan>)

475 IEU OpenGWAS Project (<https://gwas.mrcieu.ac.uk/>)

476 Online Mendelian Inheritance in Man (<http://www.omim.org>)

477

478 **Data Availability**

479 The MEGA data analyzed in this publication have been deposited in dbGap and are accessible

480 through dbGap Study Accession number phs002056.v1.p1.

481 **References**

- 482 1. Washington, S.L., Jeong, C.W., Lonergan, P.E., Herlemann, A., Gomez, S.L., Carroll, P.R.,  
483 and Cooperberg, M.R. (2020). Regional Variation in Active Surveillance for Low-Risk Prostate  
484 Cancer in the US. *JAMA Netw Open* 3, e2031349.
- 485 2. Mohler, J.L., Antonarakis, E.S., Armstrong, A.J., D'Amico, A.V., Davis, B.J., Dorff, T.,  
486 Eastham, J.A., Enke, C.A., Farrington, T.A., Higano, C.S., et al. (2019). Prostate Cancer,  
487 Version 2.2019, NCCN Clinical Practice Guidelines in Oncology. *J Natl Compr Canc Netw* 17,  
488 479–505.
- 489 3. Loeb, S., Byrne, N., Makarov, D.V., Lepor, H., and Walter, D. (2018). Use of Conservative  
490 Management for Low-Risk Prostate Cancer in the Veterans Affairs Integrated Health Care  
491 System From 2005-2015. *JAMA* 319, 2231–2233.
- 492 4. Parikh, R.B., Robinson, K.W., Chhatre, S., Medvedeva, E., Cashy, J.P., Veera, S., Bauml,  
493 J.M., Fojo, T., Navathe, A.S., Malkowicz, S.B., et al. (2020). Comparison by Race of  
494 Conservative Management for Low-Risk and Intermediate-Risk Prostate Cancers in Veterans  
495 From 2004 to 2018. *JAMA Netw Open* 3, e2018318.
- 496 5. Loeb, S., Folkvaljon, Y., Curnyn, C., Robinson, D., Bratt, O., and Stattin, P. (2017). Uptake of  
497 Active Surveillance for Very-Low-Risk Prostate Cancer in Sweden. *JAMA Oncol* 3, 1393–1398.
- 498 6. Stolzenbach, L.F., Rosiello, G., Pecoraro, A., Palumbo, C., Luzzago, S., Deuker, M., Tian, Z.,  
499 Knipper, A.-S., Pompe, R., Zorn, K.C., et al. (2020). Prostate Cancer Grade and Stage  
500 Misclassification in Active Surveillance Candidates: Black Versus White Patients. *Journal of the*  
501 *National Comprehensive Cancer Network* 18, 1492–1499.

502 7. Klotz, L., Vesprini, D., Sethukavalan, P., Jethava, V., Zhang, L., Jain, S., Yamamoto, T.,  
503 Mamedov, A., and Loblaw, A. (2015). Long-term follow-up of a large active surveillance cohort  
504 of patients with prostate cancer. *J Clin Oncol* 33, 272–277.

505 8. Cooperberg, M.R., Brooks, J.D., Faino, A.V., Newcomb, L.F., Kearns, J.T., Carroll, P.R.,  
506 Dash, A., Etzioni, R., Fabrizio, M.D., Gleave, M.E., et al. (2018). Refined Analysis of Prostate-  
507 specific Antigen Kinetics to Predict Prostate Cancer Active Surveillance Outcomes. *Eur Urol* 74,  
508 211–217.

509 9. Williams, C., Khondakar, N.R., Daneshvar, M.A., O'Connor, L.P., Gomella, P.T., Mehralivand,  
510 S., Yerram, N.K., Egan, J., Gurram, S., Rompré-Brodeur, A., et al. (2021). The Risk of Prostate  
511 Cancer Progression in Active Surveillance Patients With Bilateral Disease Detected by  
512 Combined MRI-Fusion and Systematic Biopsy. *J Urol* 101097JU0000000000001941.

513 10. Eggener, S.E., Rumble, R.B., Armstrong, A.J., Morgan, T.M., Crispino, T., Cornford, P., van  
514 der Kwast, T., Grignon, D.J., Rai, A.J., Agarwal, N., et al. (2020). Molecular Biomarkers in  
515 Localized Prostate Cancer: ASCO Guideline. *J Clin Oncol* 38, 1474–1494.

516 11. Black, M.H., Li, S., LaDuca, H., Lo, M., Chen, J., Hoiness, R., Gutierrez, S., Tippin-Davis,  
517 B., Lu, H., Gielzak, M., et al. (2020). Validation of a prostate cancer polygenic risk score.  
518 *Prostate* 80, 1314–1321.

519 12. Langeberg, W.J., Isaacs, W.B., and Stanford, J.L. (2007). Genetic etiology of hereditary  
520 prostate cancer. *Front Biosci* 12, 4101–4110.

521 13. Lichtenstein, P., Holm, N.V., Verkasalo, P.K., Iliadou, A., Kaprio, J., Koskenvuo, M.,  
522 Pukkala, E., Skytthe, A., and Hemminki, K. (2000). Environmental and heritable factors in the  
523 causation of cancer--analyses of cohorts of twins from Sweden, Denmark, and Finland. *N Engl J*  
524 *Med* 343, 78–85.

- 525 14. Narod, S. (1999). Genetic epidemiology of prostate cancer. *Biochim Biophys Acta* 1423, F1-  
526 13.
- 527 15. Schumacher, F.R., Al Olama, A.A., Berndt, S.I., Benlloch, S., Ahmed, M., Saunders, E.J.,  
528 Dadaev, T., Leongamornlert, D., Anokian, E., Cieza-Borrella, C., et al. (2018). Association  
529 analyses of more than 140,000 men identify 63 new prostate cancer susceptibility loci. *Nat*  
530 *Genet* 50, 928–936.
- 531 16. Ahn, J., Kibel, A.S., Park, J.Y., Rebbeck, T.R., Rennert, H., Stanford, J.L., Ostrander, E.A.,  
532 Chanock, S., Wang, M.-H., Mittal, R.D., et al. (2011). Prostate cancer predisposition loci and  
533 risk of metastatic disease and prostate cancer recurrence. *Clin Cancer Res* 17, 1075–1081.
- 534 17. Amin Al Olama, A., Kote-Jarai, Z., Schumacher, F.R., Wiklund, F., Berndt, S.I., Benlloch, S.,  
535 Giles, G.G., Severi, G., Neal, D.E., Hamdy, F.C., et al. (2013). A meta-analysis of genome-wide  
536 association studies to identify prostate cancer susceptibility loci associated with aggressive and  
537 non-aggressive disease. *Hum Mol Genet* 22, 408–415.
- 538 18. Bao, B.-Y., Pao, J.-B., Huang, C.-N., Pu, Y.-S., Chang, T.-Y., Lan, Y.-H., Lu, T.-L., Lee, H.-  
539 Z., Chen, L.-M., Ting, W.-C., et al. (2012). Significant associations of prostate cancer  
540 susceptibility variants with survival in patients treated with androgen-deprivation therapy. *Int J*  
541 *Cancer* 130, 876–884.
- 542 19. Bensen, J.T., Xu, Z., Smith, G.J., Mohler, J.L., Fontham, E.T.H., and Taylor, J.A. (2013).  
543 Genetic polymorphism and prostate cancer aggressiveness: a case-only study of 1,536 GWAS  
544 and candidate SNPs in African-Americans and European-Americans. *Prostate* 73, 11–22.
- 545 20. Chen, M., Huang, Y.-C., Yang, S., Hsu, J.-M., Chang, Y.-H., Huang, W.J.-S., and Chen, Y.-  
546 M.A. (2010). Common variants at 8q24 are associated with prostate cancer risk in Taiwanese  
547 men. *Prostate* 70, 502–507.



548 21. Eeles, R.A., Kote-Jarai, Z., Giles, G.G., Olama, A.A.A., Guy, M., Jugurnauth, S.K.,  
549 Mulholland, S., Leongamornlert, D.A., Edwards, S.M., Morrison, J., et al. (2008). Multiple newly  
550 identified loci associated with prostate cancer susceptibility. *Nat Genet* 40, 316–321.

551 22. Eeles, R.A., Olama, A.A.A., Benlloch, S., Saunders, E.J., Leongamornlert, D.A.,  
552 Tymrakiewicz, M., Ghoussaini, M., Luccarini, C., Dennis, J., Jugurnauth-Little, S., et al. (2013).  
553 Identification of 23 new prostate cancer susceptibility loci using the iCOGS custom genotyping  
554 array. *Nat Genet* 45, 385–391, 391e1-2.

555 23. FitzGerald, L.M., Kwon, E.M., Conomos, M.P., Kolb, S., Holt, S.K., Levine, D., Feng, Z.,  
556 Ostrander, E.A., and Stanford, J.L. (2011). Genome-wide association study identifies a genetic  
557 variant associated with risk for more aggressive prostate cancer. *Cancer Epidemiol Biomarkers*  
558 *Prev* 20, 1196–1203.

559 24. Gudmundsson, J., Sulem, P., Rafnar, T., Bergthorsson, J.T., Manolescu, A., Gudbjartsson,  
560 D., Agnarsson, B.A., Sigurdsson, A., Benediktsdottir, K.R., Blondal, T., et al. (2008). Common  
561 sequence variants on 2p15 and Xp11.22 confer susceptibility to prostate cancer. *Nat Genet* 40,  
562 281–283.

563 25. Gudmundsson, J., Besenbacher, S., Sulem, P., Gudbjartsson, D.F., Olafsson, I.,  
564 Arinbjarnarson, S., Agnarsson, B.A., Benediktsdottir, K.R., Isaksson, H.J., Kostic, J.P., et al.  
565 (2010). Genetic correction of PSA values using sequence variants associated with PSA levels.  
566 *Sci Transl Med* 2, 62ra92.

567 26. Helfand, B.T., Loeb, S., Cashy, J., Meeks, J.J., Thaxton, C.S., Han, M., and Catalona, W.J.  
568 (2008). Tumor characteristics of carriers and noncarriers of the deCODE 8q24 prostate cancer  
569 susceptibility alleles. *J Urol* 179, 2197–2201; discussion 2202.

570 27. Helfand, B.T., Kan, D., Modi, P., and Catalona, W.J. (2011). Prostate cancer risk alleles  
571 significantly improve disease detection and are associated with aggressive features in patients  
572 with a “normal” prostate specific antigen and digital rectal examination. *Prostate* 71, 394–402.

573 28. Lange, E.M., Johnson, A.M., Wang, Y., Zuhlke, K.A., Lu, Y., Ribado, J.V., Keele, G.R., Li, J.,  
574 Duan, Q., Li, G., et al. (2014). Genome-wide association scan for variants associated with early-  
575 onset prostate cancer. *PLoS One* 9, e93436.

576 29. Lange, E.M., Salinas, C.A., Zuhlke, K.A., Ray, A.M., Wang, Y., Lu, Y., Ho, L.A., Luo, J., and  
577 Cooney, K.A. (2012). Early onset prostate cancer has a significant genetic component. *Prostate*  
578 72, 147–156.

579 30. Lin, D.W., FitzGerald, L.M., Fu, R., Kwon, E.M., Zheng, S.L., Kolb, S., Wiklund, F., Stattin,  
580 P., Isaacs, W.B., Xu, J., et al. (2011). Genetic variants in the LEPR, CRY1, RNASEL, IL4, and  
581 ARVCF genes are prognostic markers of prostate cancer-specific mortality. *Cancer Epidemiol*  
582 *Biomarkers Prev* 20, 1928–1936.

583 31. Loeb, S., Carter, H.B., Walsh, P.C., Isaacs, W.B., Kettermann, A., Tanaka, T., Ferrucci, L.,  
584 and Metter, E.J. (2009). Single nucleotide polymorphisms and the likelihood of prostate cancer  
585 at a given prostate specific antigen level. *J Urol* 182, 101–104; discussion 105.

586 32. Pal, P., Xi, H., Guha, S., Sun, G., Helfand, B.T., Meeks, J.J., Suarez, B.K., Catalona, W.J.,  
587 and Deka, R. (2009). Common variants in 8q24 are associated with risk for prostate cancer and  
588 tumor aggressiveness in men of European ancestry. *Prostate* 69, 1548–1556.

589 33. Pomerantz, M.M., Werner, L., Xie, W., Regan, M.M., Lee, G.-S.M., Sun, T., Evan, C.,  
590 Petrozziello, G., Nakabayashi, M., Oh, W.K., et al. (2011). Association of prostate cancer risk  
591 Loci with disease aggressiveness and prostate cancer-specific mortality. *Cancer Prev Res*  
592 (Phila) 4, 719–728.

- 593 34. Sun, J., Lange, E.M., Isaacs, S.D., Liu, W., Wiley, K.E., Lange, L., Gronberg, H., Duggan,  
594 D., Carpten, J.D., Walsh, P.C., et al. (2008). Chromosome 8q24 risk variants in hereditary and  
595 non-hereditary prostate cancer patients. *Prostate* 68, 489–497.
- 596 35. Xu, J., Zheng, S.L., Isaacs, S.D., Wiley, K.E., Wiklund, F., Sun, J., Kader, A.K., Li, G.,  
597 Purcell, L.D., Kim, S.-T., et al. (2010). Inherited genetic variant predisposes to aggressive but  
598 not indolent prostate cancer. *Proc Natl Acad Sci U S A* 107, 2136–2140.
- 599 36. Goh, C.L., and Eeles, R.A. (2014). Germline genetic variants associated with prostate  
600 cancer and potential relevance to clinical practice. *Recent Results Cancer Res* 202, 9–26.
- 601 37. Ishak, M.B., and Giri, V.N. (2011). A systematic review of replication studies of prostate  
602 cancer susceptibility genetic variants in high-risk men originally identified from genome-wide  
603 association studies. *Cancer Epidemiol Biomarkers Prev* 20, 1599–1610.
- 604 38. Kim, S.-T., Cheng, Y., Hsu, F.-C., Jin, T., Kader, A.K., Zheng, S.L., Isaacs, W.B., Xu, J., and  
605 Sun, J. (2010). Prostate cancer risk-associated variants reported from genome-wide association  
606 studies: meta-analysis and their contribution to genetic Variation. *Prostate* 70, 1729–1738.
- 607 39. Lindström, S., Zheng, S.L., Wiklund, F., Jonsson, B.-A., Adami, H.-O., Bälter, K.A., Brookes,  
608 A.J., Sun, J., Chang, B.-L., Liu, W., et al. (2006). Systematic replication study of reported  
609 genetic associations in prostate cancer: Strong support for genetic variation in the androgen  
610 pathway. *Prostate* 66, 1729–1743.
- 611 40. Pomerantz, M.M., and Freedman, M.L. (2010). Genetics of prostate cancer risk. *Mt Sinai J*  
612 *Med* 77, 643–654.

613 41. Na, R., Liu, F., Zhang, P., Ye, D., Xu, C., Shao, Q., Qi, J., Wang, X., Chen, Z., Wang, M., et  
614 al. (2013). Evaluation of reported prostate cancer risk-associated SNPs from genome-wide  
615 association studies of various racial populations in Chinese men. *Prostate* 73, 1623–1635.

616 42. Bensen, J.T., Xu, Z., McKeigue, P.M., Smith, G.J., Fontham, E.T.H., Mohler, J.L., and  
617 Taylor, J.A. (2014). Admixture mapping of prostate cancer in African Americans participating in  
618 the North Carolina-Louisiana Prostate Cancer Project (PCaP). *Prostate* 74, 1–9.

619 43. Conti, D.V., Darst, B.F., Moss, L.C., Saunders, E.J., Sheng, X., Chou, A., Schumacher,  
620 F.R., Olama, A.A.A., Benlloch, S., Dadaev, T., et al. (2021). Trans-ancestry genome-wide  
621 association meta-analysis of prostate cancer identifies new susceptibility loci and informs  
622 genetic risk prediction. *Nat Genet* 53, 65–75.

623 44. Chen, H., Liu, X., Brendler, C.B., Ankerst, D.P., Leach, R.J., Goodman, P.J., Lucia, M.S.,  
624 Tangen, C.M., Wang, L., Hsu, F.-C., et al. (2016). Adding genetic risk score to family history  
625 identifies twice as many high-risk men for prostate cancer: Results from the prostate cancer  
626 prevention trial. *Prostate* 76, 1120–1129.

627 45. Helfand, B.T., Kearns, J., Conran, C., and Xu, J. (2016). Clinical validity and utility of genetic  
628 risk scores in prostate cancer. *Asian J Androl* 18, 509–514.

629 46. Huynh-Le, M.-P., Karunamuni, R., Fan, C.C., Thompson, W.K., Muir, K., Lophatananon, A.,  
630 Tye, K., Wolk, A., Håkansson, N., Mills, I.G., et al. (2021). Common genetic and clinical risk  
631 factors: association with fatal prostate cancer in the Cohort of Swedish Men. *Prostate Cancer*  
632 *Prostatic Dis.*

633 47. Helfand, B.T., and Xu, J. (2021). Germline Testing for Prostate Cancer Prognosis:  
634 Implications for Active Surveillance. *Urol Clin North Am* 48, 401–409.

- 635 48. Hoffmann, T.J., Passarelli, M.N., Graff, R.E., Emami, N.C., Sakoda, L.C., Jorgenson, E.,  
636 Habel, L.A., Shan, J., Ranatunga, D.K., Quesenberry, C.P., et al. (2017). Genome-wide  
637 association study of prostate-specific antigen levels identifies novel loci independent of prostate  
638 cancer. *Nat Commun* 8, 14248.
- 639 49. Cooley, L.F., Emeka, A.A., Meyers, T.J., Helfand, B.T., Scholtens, D.M., Witte, J.S., and  
640 Catalona, W.J. Factors Associated with Time to Conversion from Active Surveillance to  
641 Treatment for Prostate Cancer in a Multi-institutional Cohort. *Journal of Urology Manuscript*  
642 *accepted for publication*,.
- 643 50. Van Hemelrijck, M., Ji, X., Helleman, J., Roobol, M.J., van der Linden, W., Nieboer, D.,  
644 Bangma, C.H., Frydenberg, M., Rannikko, A., Lee, L.S., et al. (2019). Reasons for Discontinuing  
645 Active Surveillance: Assessment of 21 Centres in 12 Countries in the Movember GAP3  
646 Consortium. *Eur Urol* 75, 523–531.
- 647 51. Gregg, J.R., Davis, J.W., Reichard, C., Wang, X., Achim, M., Chapin, B.F., Pisters, L.,  
648 Pettaway, C., Ward, J.F., Choi, S., et al. (2020). Determining Clinically Based Factors  
649 Associated With Reclassification in the Pre-MRI Era using a Large Prospective Active  
650 Surveillance Cohort. *Urology* 138, 91–97.
- 651 52. Welty, C.J., Cowan, J.E., Nguyen, H., Shinohara, K., Perez, N., Greene, K.L., Chan, J.M.,  
652 Meng, M.V., Simko, J.P., Cooperberg, M.R., et al. (2015). Extended followup and risk factors for  
653 disease reclassification in a large active surveillance cohort for localized prostate cancer. *J Urol*  
654 193, 807–811.
- 655 53. Hamdy, F.C., Donovan, J.L., Lane, J.A., Mason, M., Metcalfe, C., Holding, P., Davis, M.,  
656 Peters, T.J., Turner, E.L., Martin, R.M., et al. (2016). 10-Year Outcomes after Monitoring,

657 Surgery, or Radiotherapy for Localized Prostate Cancer. *New England Journal of Medicine* 375,  
658 1415–1424.

659 54. Harris, P.A., Taylor, R., Thielke, R., Payne, J., Gonzalez, N., and Conde, J.G. (2009).  
660 Research electronic data capture (REDCap)--a metadata-driven methodology and workflow  
661 process for providing translational research informatics support. *J Biomed Inform* 42, 377–381.

662 55. Harris, P.A., Taylor, R., Minor, B.L., Elliott, V., Fernandez, M., O'Neal, L., McLeod, L.,  
663 Delacqua, G., Delacqua, F., Kirby, J., et al. (2019). The REDCap consortium: Building an  
664 international community of software platform partners. *J Biomed Inform* 95, 103208.

665 56. Gordetsky, J., and Epstein, J. (2016). Grading of prostatic adenocarcinoma: current state  
666 and prognostic implications. *Diagn Pathol* 11, 25.

667 57. Alexander, D.H., Novembre, J., and Lange, K. (2009). Fast model-based estimation of  
668 ancestry in unrelated individuals. *Genome Res* 19, 1655–1664.

669 58. Rizvi, A.A., Karaesmen, E., Morgan, M., Preus, L., Wang, J., Sovic, M., Hahn, T., and  
670 Sucheston-Campbell, L.E. (2019). gwasurvivr: an R package for genome-wide survival analysis.  
671 *Bioinformatics* 35, 1968–1970.

672 59. Willer, C.J., Li, Y., and Abecasis, G.R. (2010). METAL: fast and efficient meta-analysis of  
673 genomewide association scans. *Bioinformatics* 26, 2190–2191.

674 60. Barbeira, A.N., Pividori, M., Zheng, J., Wheeler, H.E., Nicolae, D.L., and Im, H.K. (2019).  
675 Integrating predicted transcriptome from multiple tissues improves association detection. *PLOS*  
676 *Genetics* 15, e1007889.

677 61. Chambless, L.E., and Diao, G. (2006). Estimation of time-dependent area under the ROC  
678 curve for long-term risk prediction. *Stat Med* 25, 3474–3486.

679 62. Reiter, J.F., Alexander, J., Rodaway, A., Yelon, D., Patient, R., Holder, N., and Stainier,  
680 D.Y.R. (1999). *Gata5* is required for the development of the heart and endoderm in zebrafish.  
681 *Genes Dev* 13, 2983–2995.

682 63. Gudmundsson, J., Sigurdsson, J.K., Stefansdottir, L., Agnarsson, B.A., Isaksson, H.J.,  
683 Stefansson, O.A., Gudjonsson, S.A., Gudbjartsson, D.F., Masson, G., Frigge, M.L., et al.  
684 (2018). Genome-wide associations for benign prostatic hyperplasia reveal a genetic correlation  
685 with serum levels of PSA. *Nat Commun* 9, 4568.

686 64. Thiyagarajan, S., Bhatia, N., Reagan-Shaw, S., Cozma, D., Thomas-Tikhonenko, A.,  
687 Ahmad, N., and Spiegelman, V.S. (2007). Role of *GLI2* transcription factor in growth and  
688 tumorigenicity of prostate cells. *Cancer Res* 67, 10642–10646.

689 65. Zhu, S., Xu, Y., Song, M., Chen, G., Wang, H., Zhao, Y., Wang, Z., and Li, F. (2016).  
690 *PRDM16* is associated with evasion of apoptosis by prostatic cancer cells according to RNA  
691 interference screening. *Mol Med Rep* 14, 3357–3361.

692 66. Magani, F., Peacock, S.O., Rice, M.A., Martinez, M.J., Greene, A.M., Magani, P.S., Lyles,  
693 R., Weitz, J.R., and Burnstein, K.L. (2017). Targeting AR Variant-Coactivator Interactions to  
694 Exploit Prostate Cancer Vulnerabilities. *Mol Cancer Res* 15, 1469–1480.

695 67. Zhao, L.Y., Niu, Y., Santiago, A., Liu, J., Albert, S.H., Robertson, K.D., and Liao, D. (2006).  
696 An *EBF3*-mediated transcriptional program that induces cell cycle arrest and apoptosis. *Cancer*  
697 *Res* 66, 9445–9452.

698 68. Arora, A., Abdel-Fatah, T.M.A., Agarwal, D., Doherty, R., Croteau, D.L., Moseley, P.M.,  
699 Hameed, K., Green, A., Aleskandarany, M.A., Rakha, E.A., et al. (2016). Clinicopathological and  
700 prognostic significance of *RECQL5* helicase expression in breast cancers. *Carcinogenesis* 37,  
701 63–71.

702 69. Chen, E., Ahn, J.S., Sykes, D.B., Breyfogle, L.J., Godfrey, A.L., Nangalia, J., Ko, A.,  
703 DeAngelo, D.J., Green, A.R., and Mullally, A. (2015). RECQL5 Suppresses Oncogenic JAK2-  
704 Induced Replication Stress and Genomic Instability. *Cell Rep* 13, 2345–2352.

705 70. Patterson, K., Arya, L., Bottomley, S., Morgan, S., Cox, A., Catto, J., and Bryant, H.E.  
706 (2016). Altered RECQL5 expression in urothelial bladder carcinoma increases cellular  
707 proliferation and makes RECQL5 helicase activity a novel target for chemotherapy. *Oncotarget*  
708 7, 76140–76150.

709 71. Höflmayer, D., Steinhoff, A., Hube-Magg, C., Kluth, M., Simon, R., Burandt, E., Tsourlakis,  
710 M.C., Minner, S., Sauter, G., Büscheck, F., et al. (2020). Expression of CCCTC-binding factor  
711 (CTCF) is linked to poor prognosis in prostate cancer. *Molecular Oncology* 14, 129–138.

712 72. Hu, X.Y., Xu, Y.M., Fu, Q., Yu, J.J., and Huang, J. (2009). Nedd4L expression is  
713 downregulated in prostate cancer compared to benign prostatic hyperplasia. *Eur J Surg Oncol*  
714 35, 527–531.

715 73. UK Biobank.

716 74. Elsworth, B.L. (2017). MRC IEU UK Biobank GWAS pipeline version 1.

717 75. Elsworth, B., Lyon, M., Alexander, T., Liu, Y., Matthews, P., Hallett, J., Bates, P., Palmer, T.,  
718 Haberland, V., Smith, G.D., et al. (2020). The MRC IEU OpenGWAS data infrastructure  
719 (Genetics).

720 76. Kichaev, G., Bhatia, G., Loh, P.-R., Gazal, S., Burch, K., Freund, M.K., Schoech, A.,  
721 Pasaniuc, B., and Price, A.L. (2019). Leveraging Polygenic Functional Enrichment to Improve  
722 GWAS Power. *Am J Hum Genet* 104, 65–75.



723 77. Lotta, L.A., Wittemans, L.B.L., Zuber, V., Stewart, I.D., Sharp, S.J., Luan, J., Day, F.R., Li,  
724 C., Bowker, N., Cai, L., et al. (2018). Association of Genetic Variants Related to Gluteofemoral  
725 vs Abdominal Fat Distribution With Type 2 Diabetes, Coronary Disease, and Cardiovascular  
726 Risk Factors. *JAMA* 320, 2553–2563.

727 78. Wang, J., Song, C., Tang, H., Zhang, C., Tang, J., Li, X., Chen, B., and Xie, X. (2017). miR-  
728 629-3p may serve as a novel biomarker and potential therapeutic target for lung metastases of  
729 triple-negative breast cancer. *Breast Cancer Res* 19, 72.

730 79. Labbé, C., Goyette, P., Lefebvre, C., Stevens, C., Green, T., Tello-Ruiz, M.K., Cao, Z.,  
731 Landry, A.L., Stempak, J., Annese, V., et al. (2008). MAST3: a novel IBD risk factor that  
732 modulates TLR4 signaling. *Genes Immun* 9, 602–612.

733 80. Burns, J.A., Weiner, A.B., Catalona, W.J., Li, E.V., Schaeffer, E.M., Hanauer, S.B., Strong,  
734 S., Burns, J., Hussain, M.H.A., and Kundu, S.D. (2019). Inflammatory Bowel Disease and the  
735 Risk of Prostate Cancer. *Eur Urol* 75, 846–852.

736 81. Meyers, T.J., Weiner, A.B., Graff, R.E., Desai, A.S., Cooley, L.F., Catalona, W.J., Hanauer,  
737 S.B., Wu, J.D., Schaeffer, E.M., Abdulkadir, S.A., et al. (2020). Association between  
738 inflammatory bowel disease and prostate cancer: A large-scale, prospective, population-based  
739 study. *Int J Cancer* 147, 2735–2742.

740 82. Qiao, X.-R., Zhang, X., Mu, L., Tian, J., and Du, Y. (2020). GRB2-associated binding protein  
741 2 regulates multiple pathways associated with the development of prostate cancer. *Oncol Lett*  
742 20, 99.

743 83. Xu, J., Isaacs, W.B., Mamawala, M., Shi, Z., Landis, P., Petkewicz, J., Wei, J., Wang, C.-H.,  
744 Resurreccion, W.K., Na, R., et al. (2021). Association of prostate cancer polygenic risk score  
745 with number and laterality of tumor cores in active surveillance patients. *Prostate* 81, 703–709.

746

747 **Figure Titles and Legends**

748 **Figure 1. Flow chart highlighting the approach and samples used in the genome-wide**

749 **association analysis.** First, we undertook a discovery GWAS in men of European ancestry.

750 Fourteen SNPs were associated with conversion ( $P < 5 \times 10^{-8}$ ). All SNPs were evaluated for

751 replication in the replication cohorts alone and then in a meta-analysis combining the discovery

752 and replication cohorts. Four additional SNPs reached statistical significance in the combined

753 meta-analysis ( $P < 5 \times 10^{-8}$ ).

754

755 **Figure 2. Results from the GWASs of conversion from AS to treatment (a) in 5,222**

756 prostate cancer patients of European ancestry; (b) in discovery and replication cohorts. P values

757 are for variant associations with conversion, adjusted for age and ten ancestry principal

758 components using Cox proportional hazards models. Blue dashed line denotes the genome-

759 wide significance threshold. Orange peaks indicate genome-wide significant hits ( $P < 5 \times 10^{-8}$ ).

760 The top variants in each chromosome are annotated with their rsID.

761

762 **Figure 3. Association between time to conversion from AS to treatment (a) with the**

763 prostate cancer GRS; (b) with the prostate-specific antigen GRS . The fifth and sixth deciles of

764 prostate cancer GRS are used as the reference. Bars indicate 95% confidence intervals (CI)

765 around the hazard ratio (HR) estimates. The minimally adjusted model includes age and the first

766 10 genetic principal components. The fully adjusted model also includes Gleason grade group

767 (GG1, GG2, or  $\geq$  GG3); PSA concentration (ng/mL); clinical stage (cT1, cT2, or cT3/cT4); and

768 number of positive biopsy cores (1-2, 3, or  $\geq$  4).

769

770 **Figure 4. Kaplan-Meier plots of active surveillance conversion-free probability for low,**

771 **intermediate, and high clinicopathological risk categories.** The plots are stratified by the top

772 and bottom deciles of genetic risk scores for prostate cancer ( $GRS_{PC}$ , panel a) and for PSA  
773 levels ( $GRS_{PSA}$ , panel b). The curves within each risk category are compared between the top  
774 and bottom GRS deciles using a log-rank test (P-values given next to corresponding curves).

## Tables

**Table 1. Results for 4 common and 14 variants associated with conversion from AS to treatment in a genome-wide association analysis.**

| rsid                   | Chr | Genes                                                  | Risk Allele / ref allele | RAF   | HR (95% CI), p-value |                  |                           |                           |                  |                          |                        |                  |                           |
|------------------------|-----|--------------------------------------------------------|--------------------------|-------|----------------------|------------------|---------------------------|---------------------------|------------------|--------------------------|------------------------|------------------|---------------------------|
|                        |     |                                                        |                          |       | Discovery European   |                  |                           | Replication meta-analysis |                  |                          | Combined meta-analysis |                  |                           |
| <b>Common variants</b> |     |                                                        |                          |       |                      |                  |                           |                           |                  |                          |                        |                  |                           |
| rs77112978             | 18  | <i>ATP8B1</i><br><i>NEDD4L</i> <sup>a</sup>            | G/C                      | 0.048 | 1.4<br>1             | (1.23 -<br>1.63) | 1.51<br>$\times 10^{-6}$  | 2.24                      | (1.38 -<br>3.65) | 1.14<br>$\times 10^{-3}$ | 1.<br>47               | (1.28 -<br>1.68) | 3.26<br>$\times 10^{-8}$  |
| rs55850837             | 18  | <i>MC4R</i><br><i>CDH20</i> <sup>a</sup>               | A/G                      | 0.050 | 1.4<br>2             | (1.24 -<br>1.63) | 3.43<br>$\times 10^{-7}$  | 1.92                      | (1.09 -<br>3.36) | 0.0232                   | 1.<br>45               | (1.27 -<br>1.65) | 4.03<br>$\times 10^{-8}$  |
| rs17878533             | 19  | <i>IL12RB1</i> <sup>b</sup>                            | A/G                      | 0.651 | 1.2<br>3             | (1.14 -<br>1.32) | 4.56<br>$\times 10^{-8}$  | 0.94                      | (0.75 -<br>1.18) | 0.582                    | 1.<br>2                | (1.12 -<br>1.28) | 4.86<br>$\times 10^{-7}$  |
| rs74874116             | 20  | <i>RBBP8</i><br><i>NL</i><br><i>GATA5</i> <sup>a</sup> | T/G                      | 0.028 | 2.6<br>7             | (1.94 -<br>3.66) | 1.47<br>$\times 10^{-9}$  | 1.23                      | (0.93 -<br>1.64) | 0.146                    | 1.<br>74               | (1.41 -<br>2.15) | 3.14<br>$\times 10^{-7}$  |
| <b>Rare variants</b>   |     |                                                        |                          |       |                      |                  |                           |                           |                  |                          |                        |                  |                           |
| rs6658664              | 1   | <i>PRDM1</i> <sup>6b</sup>                             | A/G                      | 0.014 | 5.1<br>9             | (3.33 -<br>8.09) | 3.55<br>$\times 10^{-13}$ | 0.94                      | (0.67 -<br>1.33) | 0.746                    | 1.<br>79               | (1.37 -<br>2.46) | 2.58<br>$\times 10^{-5}$  |
| rs1404610              | 2   | <i>LINC0101</i><br><i>GLI2</i> <sup>a</sup>            | G/A                      | 0.012 | 15.<br>15            | (4.64 -<br>49.5) | 6.69<br>$\times 10^{-6}$  | 3.07                      | (1.97 -<br>4.79) | 7.84<br>$\times 10^{-7}$ | 3.<br>74               | (2.47 -<br>5.67) | 5.37<br>$\times 10^{-10}$ |
| rs116419656            | 3   | <i>FAM86D</i><br><i>MIR132</i> <sup>4a</sup>           | G/A                      | 0.010 | 6.8<br>9             | (4.03 -<br>11.8) | 1.95<br>$\times 10^{-12}$ | 0.96                      | (0.47 -<br>2.00) | 0.923                    | 3.<br>45               | (2.24 -<br>5.32) | 2.06<br>$\times 10^{-8}$  |
| rs4721243              | 7   | <i>MAD1L</i> <sup>1b</sup>                             | A/G                      | 0.010 | 5.6<br>5             | (3.26 -<br>9.8)  | 7<br>$\times 10^{-10}$    | 0.78                      | (0.5 -<br>1.22)  | 0.28                     | 1.<br>70               | (1.2 -<br>2.39)  | 2.6<br>$\times 10^{-3}$   |
| rs113658888            | 8   | <i>MROH</i> <sup>1b</sup>                              | T/C                      | 0.011 | 3.8<br>6             | (2.60 -<br>5.74) | 2.52<br>$\times 10^{-11}$ | 1.22                      | (0.84 -<br>1.78) | 0.305                    | 2.<br>11               | (1.6 -<br>2.77)  | 9.04<br>$\times 10^{-8}$  |
| rs115861550            | 9   | <i>VAV2</i> <sup>b</sup>                               | T/C                      | 0.010 | 7.5<br>1             | (4.48 -<br>12.6) | 2.03<br>$\times 10^{-14}$ | 1.01                      | (0.69 -<br>1.48) | 0.943                    | 2.<br>05               | (1.51 -<br>2.79) | 4.26<br>$\times 10^{-6}$  |
| rs3750827              | 10  | <i>EBF3</i> <sup>b</sup>                               | A/G                      | 0.011 | 2.4<br>2             | (1.79 -<br>3.21) | 5.05<br>$\times 10^{-9}$  | 1.78                      | (1.04 -<br>3.03) | 0.035                    | 2.<br>24               | (1.73 -<br>2.89) | 8.29<br>$\times 10^{-10}$ |
| rs28514969             | 11  | <i>TSPAN4</i> <sup>b</sup>                             | C/T                      | 0.011 | 14.<br>16            | (5.78 -<br>34.7) | 6.69<br>$\times 10^{-9}$  | 1.49                      | (0.92 -<br>2.39) | 0.103                    | 2.<br>44               | (1.6 -<br>3.72)  | 3.16<br>$\times 10^{-5}$  |
| rs563064               | 13  | <i>F10</i> <sup>c</sup>                                | A/G                      | 0.010 | 34.<br>03            | (10.4 -<br>111)  | 4.59<br>$\times 10^{-9}$  | 2.2                       | (1.45 -<br>3.34) | 1.96<br>$\times 10^{-4}$ | 2.<br>98               | (2.01 -<br>4.41) | 4.89<br>$\times 10^{-8}$  |
| rs820198               | 17  | <i>RECQL5</i> <sup>b</sup>                             | T/C                      | 0.010 | 14.<br>26            | (6.56 -<br>31.0) | 2.03<br>$\times 10^{-11}$ | 1.2                       | (0.67 -<br>2.17) | 0.537                    | 2.<br>97               | (1.86 -<br>4.75) | 5.50<br>$\times 10^{-6}$  |
| rs12452625             | 17  | <i>RFNG</i> <sup>d</sup>                               | A/G                      | 0.011 | 3.8<br>4             | (2.65 -<br>5.57) | 1.20<br>$\times 10^{-12}$ | 1.03                      | (0.68 -<br>1.56) | 0.878                    | 2.<br>14               | (1.62 -<br>2.82) | 6.84<br>$\times 10^{-8}$  |
| rs59027729             | 19  | <i>HCN2</i> <sup>b</sup>                               | A/G                      | 0.014 | 2.0<br>6             | (1.58 -<br>2.68) | 7.24<br>$\times 10^{-8}$  | 1.47                      | (0.92 -<br>2.34) | 0.109                    | 1.<br>90               | (1.51 -<br>2.39) | 4.25<br>$\times 10^{-8}$  |
| rs116837676            | 19  | <i>MYAD</i> <sup>Mb</sup>                              | A/G                      | 0.011 | 5.4<br>2             | (3.00 -<br>9.77) | 2.01<br>$\times 10^{-8}$  | 1.72                      | (1.17 -<br>2.53) | 5.66<br>$\times 10^{-3}$ | 2.<br>42               | (1.76 -<br>3.34) | 7.34<br>$\times 10^{-8}$  |
| rs56064912             | X   | <i>POF1B</i><br><i>MIR132</i> <sup>1a</sup>            | T/G                      | 0.010 | 24.<br>7             | (8.95 -<br>68.3) | 6.13<br>$\times 10^{-10}$ | 1.07                      | (0.85 -<br>1.36) | 0.55                     | 1.<br>26               | (1 - 1.59)       | 0.0475                    |

Chr, chromosome; Ref, reference; RAF = Risk allele frequency; HR, hazard ratio; CI, Confidence Interval. SNPs included here are those with association  $P < 5 \times 10^{-8}$  either in European discovery GWAS or combined meta-analysis of all samples.

In the Genes column

<sup>a</sup> Intergenic (genes are two flanking)

<sup>b</sup> Intronic

<sup>c</sup> Upstream

<sup>d</sup> UTR3

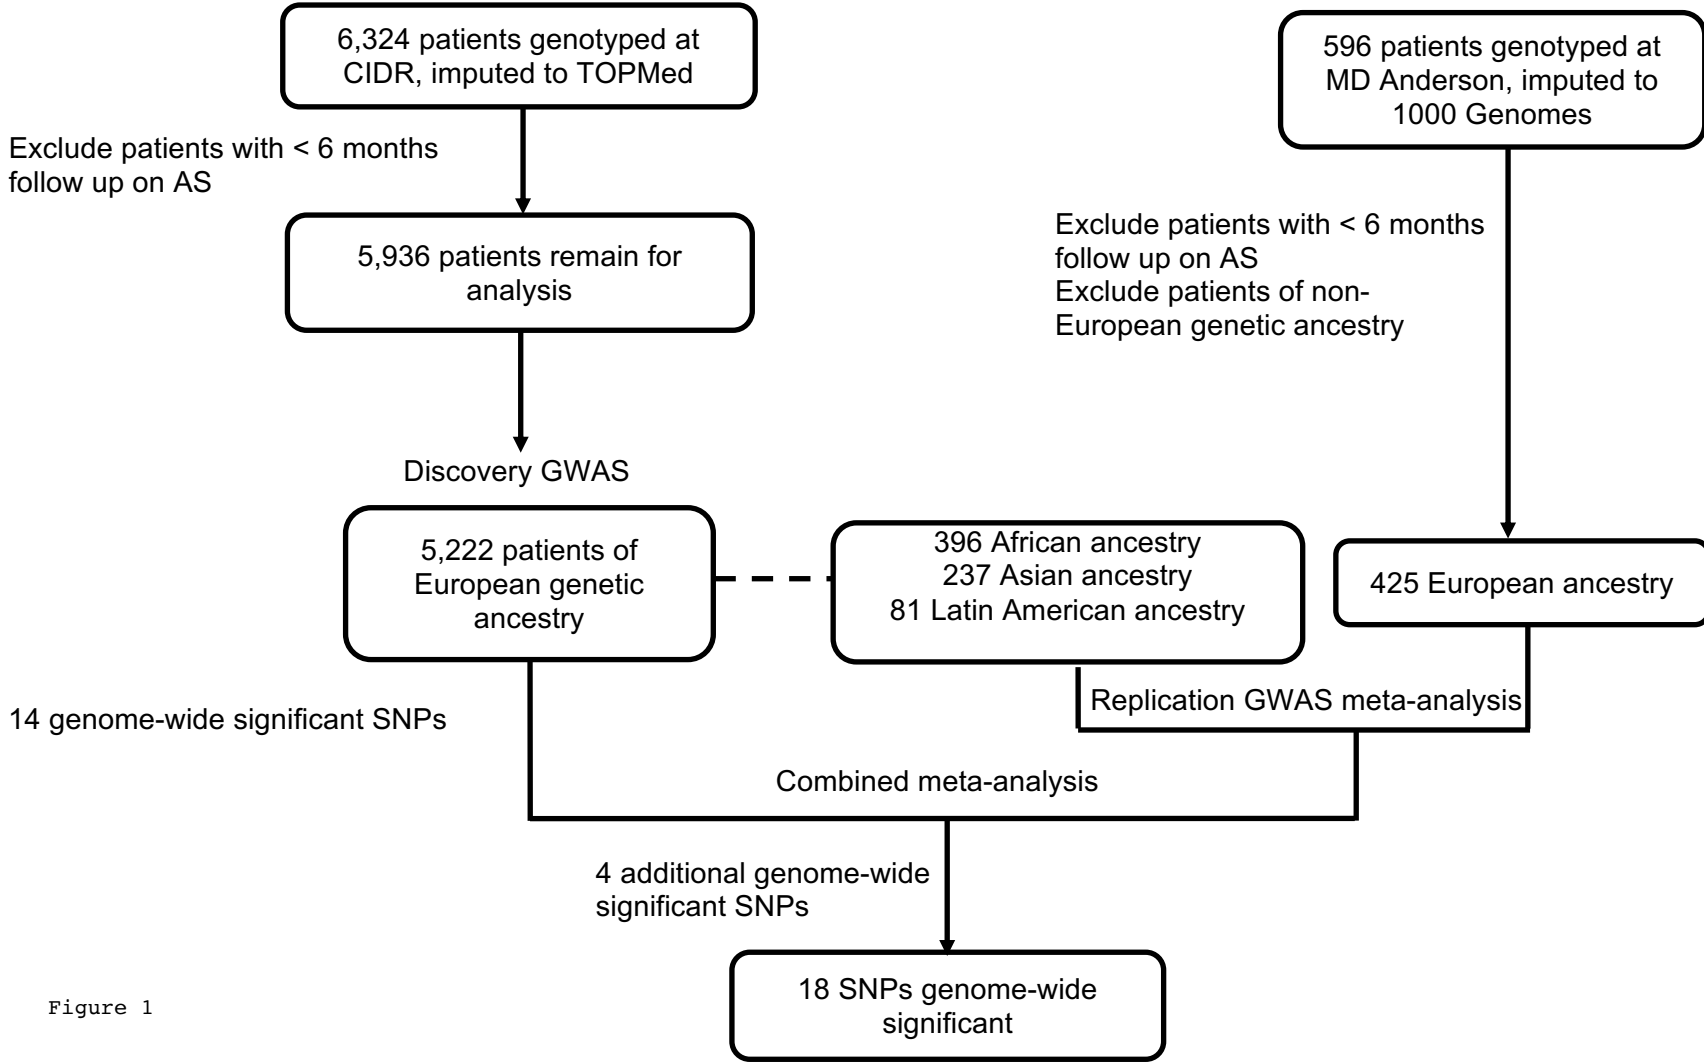

Figure 1

Figure 2

(a)

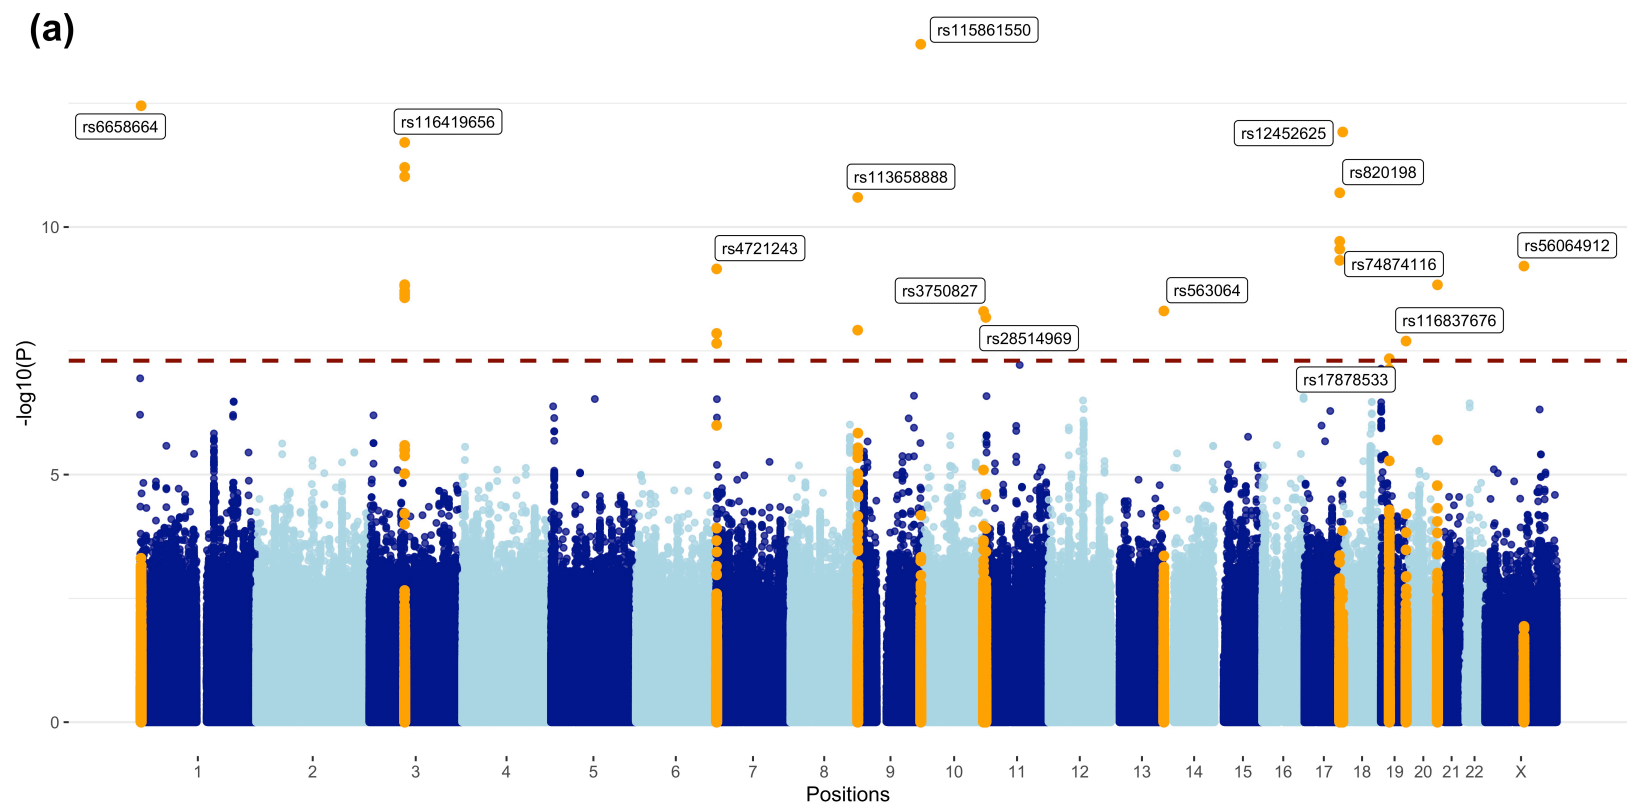

(b)

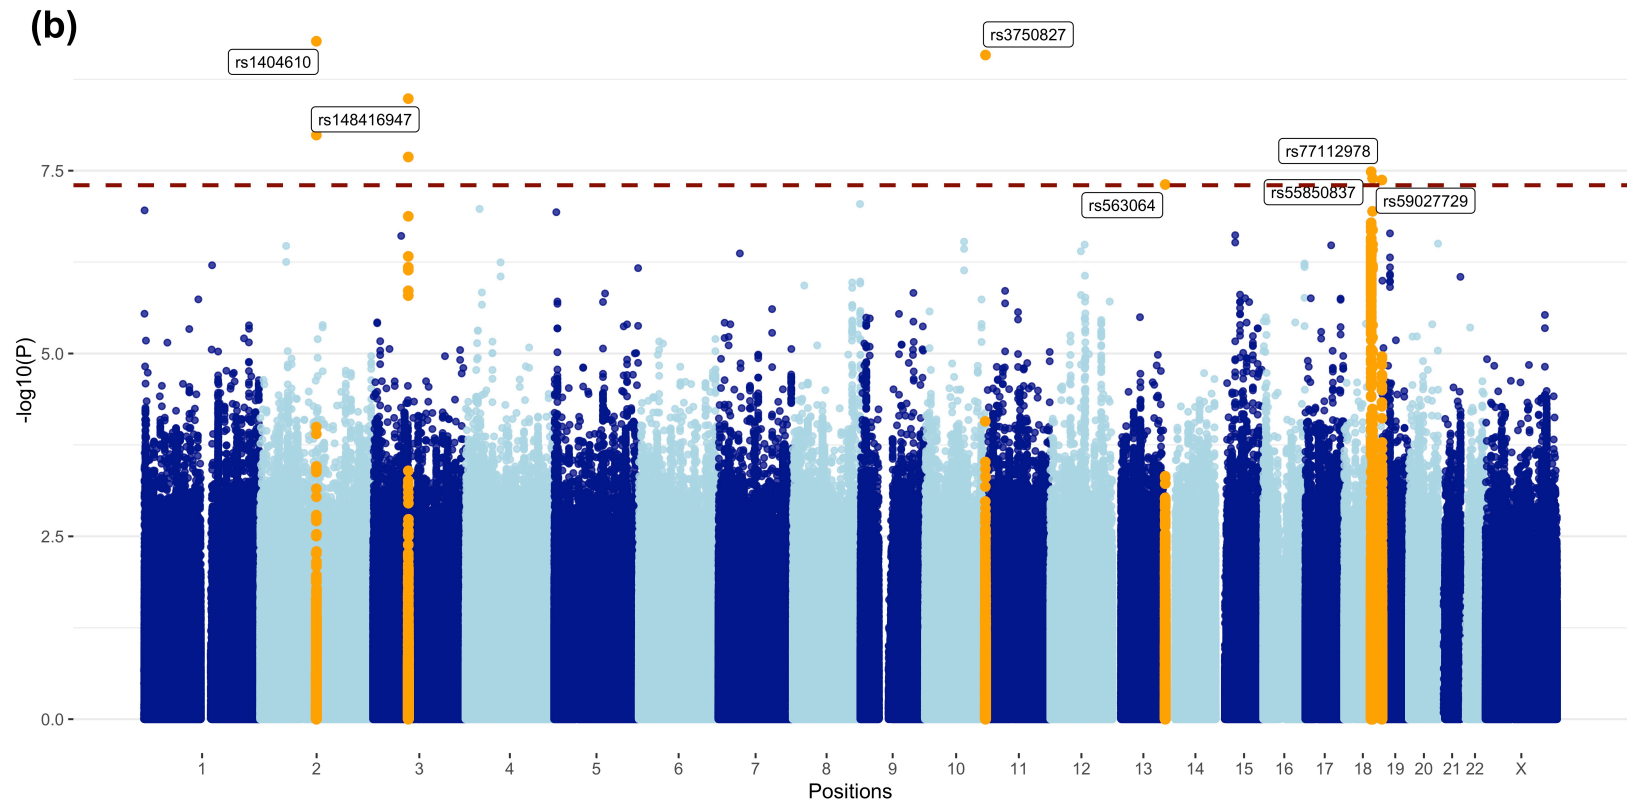

Figure 3

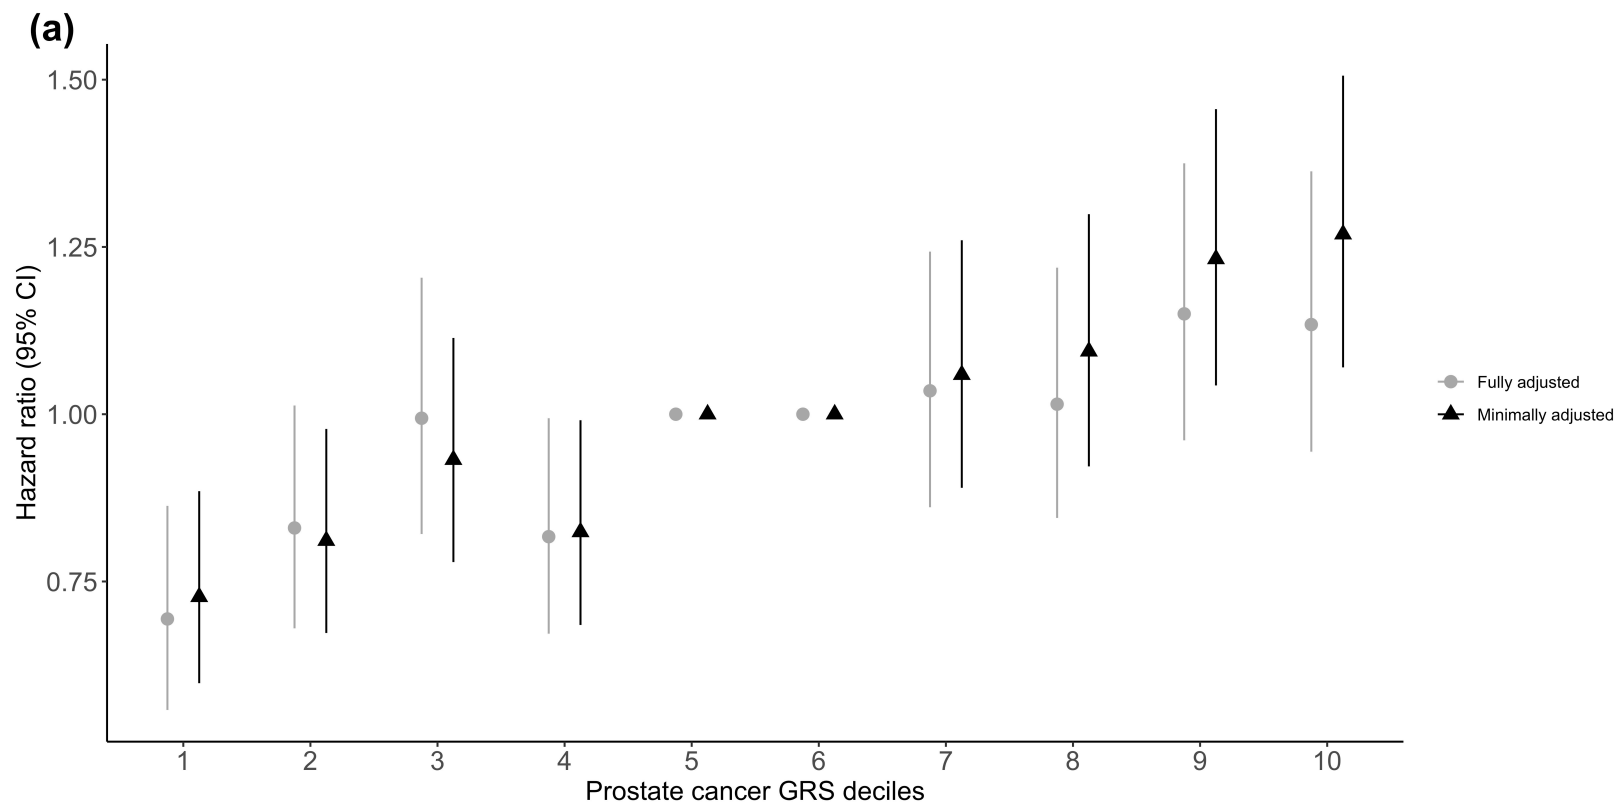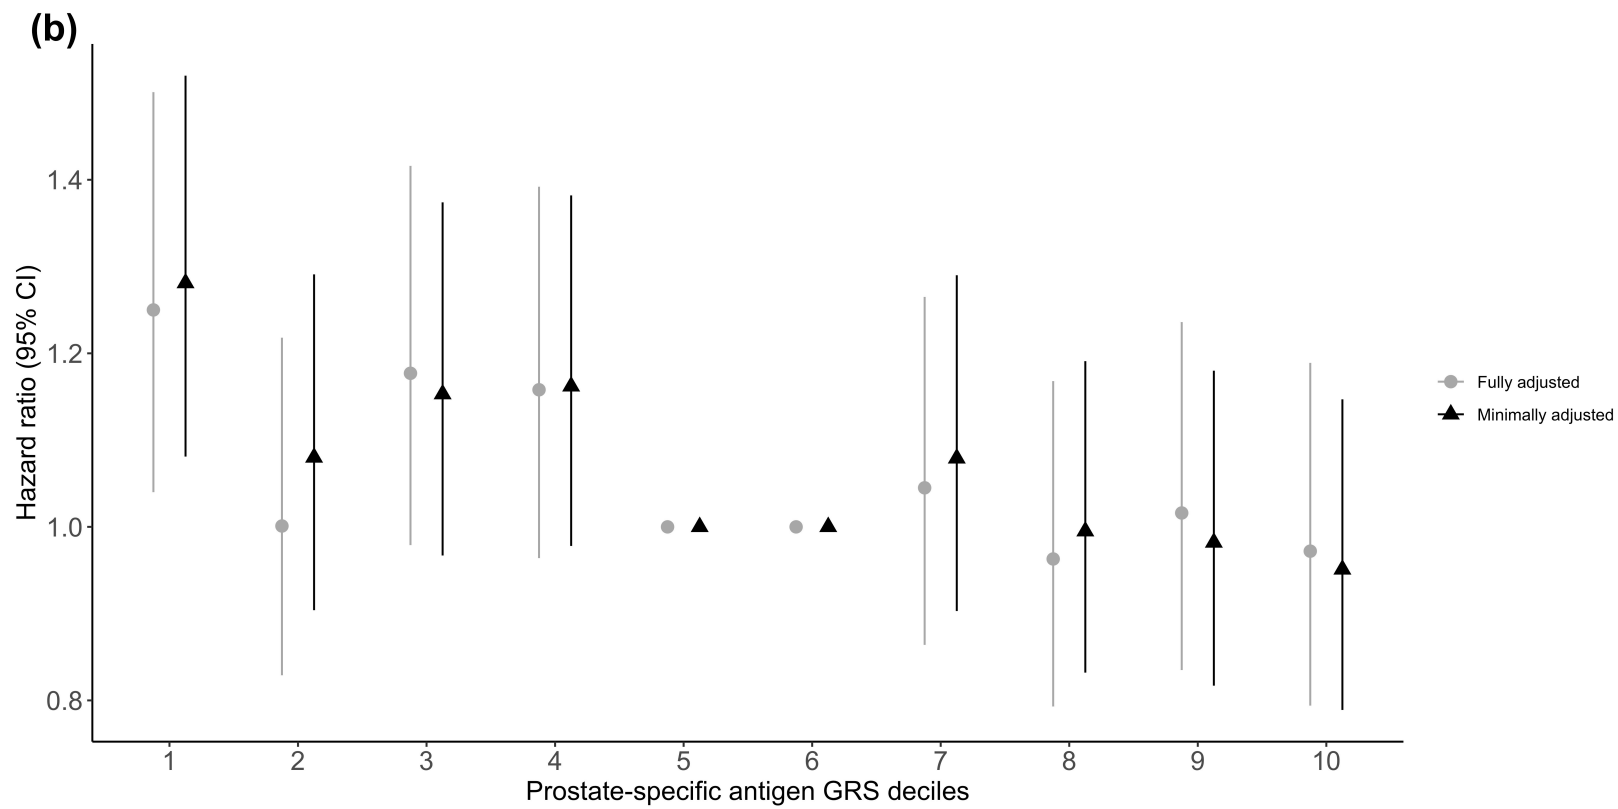

Figure 4

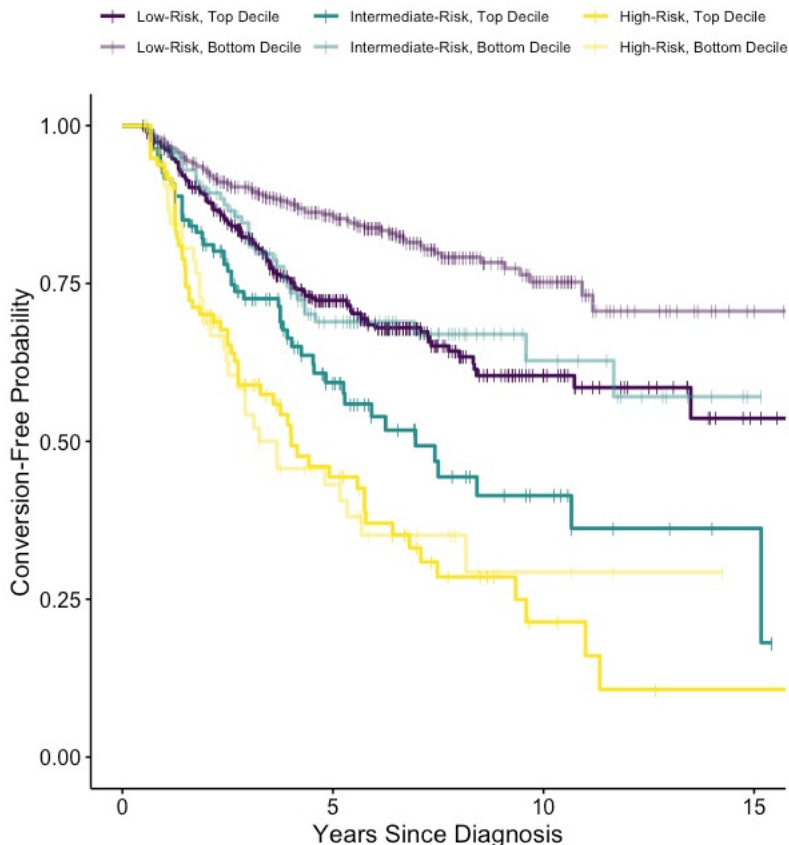

Number at risk

|                                  |     |     |    |   |
|----------------------------------|-----|-----|----|---|
| Low-Risk, Top Decile             | 387 | 186 | 40 | 6 |
| Low-Risk, Bottom Decile          | 424 | 250 | 57 | 7 |
| Intermediate-Risk, Top Decile    | 108 | 38  | 11 | 2 |
| Intermediate-Risk, Bottom Decile | 118 | 55  | 14 | 1 |
| High-Risk, Top Decile            | 98  | 27  | 5  | 1 |
| High-Risk, Bottom Decile         | 52  | 17  | 3  | 0 |

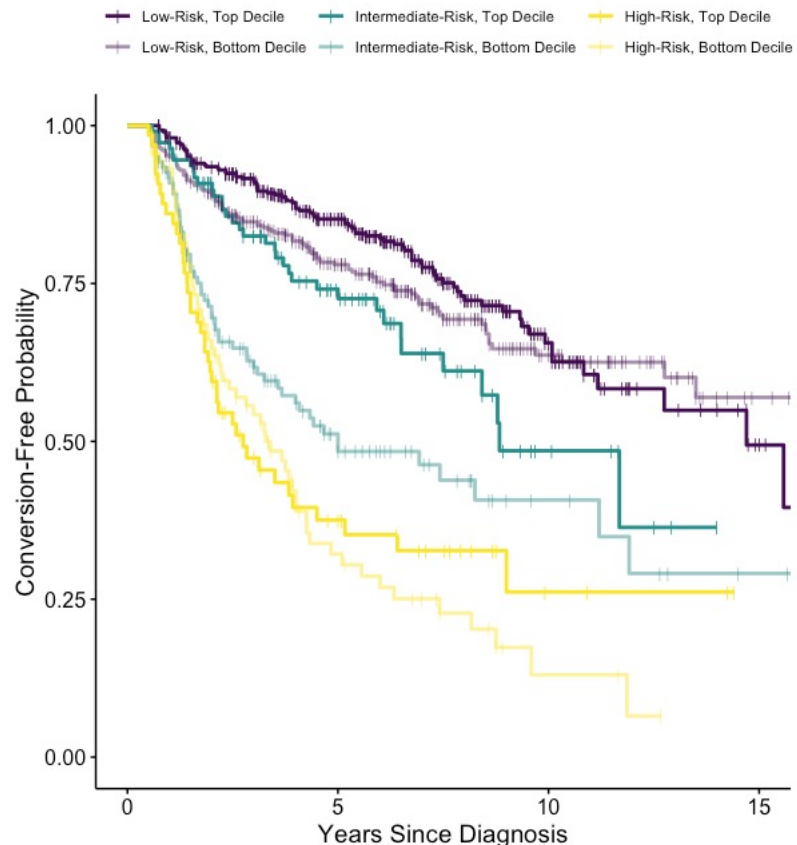

Number at risk

|                                  |     |     |    |    |
|----------------------------------|-----|-----|----|----|
| Low-Risk, Top Decile             | 416 | 238 | 46 | 7  |
| Low-Risk, Bottom Decile          | 383 | 210 | 60 | 11 |
| Intermediate-Risk, Top Decile    | 111 | 49  | 7  | 0  |
| Intermediate-Risk, Bottom Decile | 122 | 35  | 8  | 2  |
| High-Risk, Top Decile            | 66  | 17  | 3  | 0  |
| High-Risk, Bottom Decile         | 89  | 19  | 3  | 0  |
